# Supplementary material for: Precise Characterization of Bombyx mori Fibroin Heavy Chain Gene Using Cpf1-Based Enrichment and Oxford Nanopore Technologies
Source: MDPI journal article supplement (doi:10.3390/insects12090832), 2021-09-16
Supplement: s1 [file s1]

**Supplementary Note S1** | The target sequence of FibH-up1 crRNA

TTTGAATAAGTGCTTAATTGCAAGTAACGTAACAATGTTTTAGGGTTCGGTCCTCAATA  
AATTCGACCAATAAACCATACAAATTCTTTAACATTTTTTTAATCTTATACTAGCTGACC  
CGGCAGACTTCGTGGTGCCTCAATCGATAAATAAAATACCTATGCTTCTGTATAAAATA  
AACATAAAACAAACAAAAGGAATCCGTCCGACGGGAGACACATCAAAGGAAAAAC  
ATCTTTTTTATTTTTTTTACCTTTTAAACCTTCTCTGGACTTCCACAAATAATTTAAGACCA  
AAATTAGCCAAATCGGTCTAGCATTTTCGAGTTTTAGCGAGACTAACGAACAGCAATT  
CATTTTTATATACACAGATTTATGTTACCGGGGTCTAGTGACCTAAACGACTTCAGCT  
CTAACACTAGGCTAACTCAGGCTTAGTAGCCTGGTCCTAGTGTTAGATTGAAGTCGTC  
TAATGCAAAGATTATTGGATCTGATGGATCCGTAAGGACGTGTCTAGAGCGTCGACGG  
TGACTAGCTCCTGCGTGATCAGGAAAAATGTGGAAAGCTTAACGATTTTGTACATTTT  
ACTTATCACAACCTTGTTTTTATAATAATTCGCTTAAATGAGCAGCTATTACTTAATCTCGT  
AGTGGTTTTTGACAAAATCAGCTTCTTTAGAACTAAAATATCATTTTTTTTCGTAATTTTTT  
TAATGAAAAATGCTCTAGTGTTATACCTTTCCAAAATCACCATTATTAGGTAGTGTTTA  
AGCTTGTTGTACAAAACCTGCCACACGCATTTTTTTCTCCACTGTAGGTTGTAGTTACG

The DNA fragments amplified by lw-Cpf1-up-F1 and lw-Cpf1-up-R1 primers were used for FibH-up1 cleavage. The bold and underlined letters are the crRNA binding sites.

**Supplementary Note S2** | The target sequence of FibH-up2 crRNA

GTCGTCTAATGCAAAGATTATTGGATCTGATGGATCCGTAAGGACGTGTCTAGAGCGTC  
GACGGTGACTAGCTCCTGCGTGATCAGGAAAAATGTGGAAAGCTTAACGATTTTGTCA  
CATTTTACTTATCACAACCTTGTTTTTATAATAATTCGCTTAAATGAGCAGCTATTACTTAA  
TCTCGTAGTGTTTTTTGACAAAATCAGCTTCTTTAGAACTAAAATATCATTTTTTTTCGTA  
ATTTTTTTAATGAAAAATGCTCTAGTGTTATACCTTTCCAAAATCACCATTATTAGGTA  
GTGTTTAAAGCTTGTTGTACAAAACCTGCCACACGCATTTTTTTCTCCACTGTAGGTTGT  
AGTTACGCGAAAACAAAATCGTTCTGTGAAAATTCAAACAAAAATATTTTTTCGTAAA  
AACACTTATCAATGAGTAAAGTAACAATTCATGAATAATTTTCATGTAAAAAAAATA  
CTAGAAAAGGAATTTTTCATTACGAGATGCTTAAAAATCTGTTTCAAGGTAGAGATTTT  
TCGATATTTTCGGAAAATTTTGTAAACTGTAAATCCGTAAAATTTTGCTAAACATATATT  
GTGTTGTTTTGTAAGTATTGACCCAAGCTATCACCTCCTGCAGTATGTCGTGCTAATTA  
CTGGACACATTGTATAACAGTTCCACTGTATTGACAATAATAAACCTCTTCATTGACT  
TGAGAATGTCTGGACAGATTTGGCTTTGTATTTTGTATTACAAATGTTTTTTTGGTGATT  
TACCCATCCAAGGCATTCTCCAG

The DNA fragments amplified by lw-Cpf1-up-F2 and lw-Cpf1-up-R2 primers were used for FibH-up2 cleavage. The bold and underlined letters are the crRNA binding sites.

**Supplementary Note S3** | The target sequence of FibH-down1 crRNA

AACTGTGGAATTCCTAGAAGACAAGTAGTTGTAAATTCAGAGCACTGCCTTGTGTGA  
ATTGCTAATTTTTAATATAAAATAACCCTTGTTTCTTACTTCGTCCTGGATACATCTATGT

TTTTTTTTTCGTTAATAAATGAGAGCATTAAAGTTATTGTTTTTAATTACTTTTTTTTAGAA  
AACAGATTTTCGGATTTTTGTATGCATTTTATTTGAATGTACTAATATAATCAATTAATCA  
ATGAATTCATTTATTTAAGGGATAACAATAATCCATGAATTCACATGCACATTTAAAC  
AAAACTAAATTACAATAGGTTCATATAAAAAACAACAAGTATGCCTTCTCAACTAAGA  
ATACTATATTGTTTAAACCGTAAAAAAGTCATATTTCTGTATATCAAAACACATCTAAT  
ATTAAAAAACAGTCAGCAAGCACTTACAAGTGTGGGCTCGGACAGCAATTACCTGG  
TCTCAGGAGACACTTGAAGAACGAGAAGCACGTCTCTCTGTGCGATTGCGAGGCTCAT  
GCACTATCGCTTGAGTCTGAGACCTTTACTGATAGGGAAATCCGTTTGAGCTCTCAGA  
GGGTTTCGGACAGCAAAAGCTTGCCCGGTCTCAGGAGACATTAGAAGAACGGGAAGC  
ATAACTCAATACCGATCGCGTTTCCATTGAGCCTATGCTTCGTGATAATAATAATAAA  
GCCCAAGGTCAGACGCTAAAAGTTGTGGGTGTAGATAT

The DNA fragments amplified by lw-Cpf1-down-F1 and lw-Cpf1-down-R1 primers were used for FibH-down1 cleavage. The bold and underlined letters are the crRNA binding sites.

#### Supplementary Note S4 | The target sequence of FibH-down2 crRNA

CCCGGTCTCAGGAGACATTAGAAGAACGGGAAGCATAACTCAATACCGATCGCGTTT  
CCATTGAGCCTATGCTTCGTGATAATAATAATAAAAGCCCAAGGTCAGACGCTAAAAG  
TTGTGGGTGTAGATATAAGTGTTAACTGCTTTTACACAGTCAACTCGGTACGCGGTT  
ATGTAGCTCTGTCACATGCTAGCAATCCTAGCAACCTGTATGCTTTGATCCCCGATGGC  
TATACGTCTACGTGCTGTATAGAGAAGCTTTACTTTAAATTACATTTTCTAAATACCTA  
AATGACGGTGCTTATAAACCAAAAAGATATGTCCTAAAACTGCTGCCCAAAGTCGCTAT  
TCCACGCGGACGGAGTCGCGGGCACAGCTAGTAATACATAAAATACCTTGGAACTCG  
AAACGGTCTTTGAGATATGGGTCGTTCTTTGAGGTATGAGGGTACAAAGAATACAAT  
ATGGTAAAGAAAGGACACGAGTATTACGAATCGGGGTAGTCAAGAATTCGAAGAAGG  
AGAGACTGTGCAAGCGCAGCTTTAGTGCGGCTGGAAGAAAATTCGTAACCGTCTT  
AAAGATTCAGCTGATGGAAACACCTTCCGACTAACCCCTTTTATCTGTGCGTTCCACA  
ATAAGTTTTTATGAATTGAGATTCCCAAATTTTTCACAGTATCACTGATAGGAATTTGTA  
CGCCGTCAAATAAAATAACCGGAAGCTGCGACTATTTAATTTTCGAACACATTCTTGA  
ATTACTGACAACAATGTCCTGTGTTTTCGACG

The DNA fragments amplified by lw-Cpf1-down-F2 and lw-Cpf1-down-R2 primers were used for FibH-down2 cleavage. The bold and underlined letters are the crRNA binding sites.

#### Supplementary Note S5 | Consensus sequence from CEO

CATCAGTTCGGTTCCTCAACTCTCAAGATGAGAGTCAAAACCTTTGTGATCTTGTGCTGC  
GCTCTGCAGGTGAGTTAATTATTTTACTATTATTTTCAAGAGGTGGCCAGACGATATCAC  
GGGCCACCTGATAATAAGTGGTCGCCAAAACGCACAGATATCGTAAATTGTGCCATTT  
GATTTGTACGCCCCGGGGCTACGGAATAAACTACATTTATTTATTTAAAAAATGAACC  
TTAGATTATGTAACCTGTGATTTATTTGCGTCAAAAGTAGGCAAGATGAATCTATGTAA  
ATACCTGGGCAGACTTGCAATATCCTATTTACCCGGTAAATCAGCATTGCAATATGCAA  
TGCATATTCAACAATATGTAAAACAATTCGTAAAGCATCATTAGAAAATAGACGAAAG

AAATTGCATAAAATTATAACCGCATTATTAATTTATTATGATATCTATTAACAATTGCTAT  
TGCCTTTTTTCGCAAATTATAATCATTTTCATAACCTCGAGGTAGCATTCTGTTACATTTT  
AATACATTGGTATGTGATTATAACACGAGCTGCCCACTGAGTTTCTCGCCAGATCTTCT  
CAGTGGGTGCGGTTACCGATCACGTGATAGATTCTATGAAGCACTGCTCTTGTTAGGGC  
TAGTGTTAGCAAATTCTTTCAGGTTGAGTCTGAGAGCTCACCTACCCATCGGAGCGTA  
GCTGGAATAGGCTACCAGCTAATAGGTAGGGAAAACAAAGCTCGAAACAAGCTCAA  
GTAATAACAACATAATGTGACCATAAAATCTCGTGGTGTATGAGATACAATTATGTACT  
TTCCACAAATGTTTACATAATTAGAATGTTGTTCAACTTGCCTAACGCCCCAGCTAGA  
ACATTCAATTATTACTATTACCACTACTAAGGCAGTATGTCCTAACTCGTTCCAGATCAG  
CGCTAACTTCGATTGAATGTGCGAAATTTATAGCTCAATATTTTAGCACTTATCGTATTG  
ATTTAAGAAAAAAATTGTTAACATTTTGTTCAGTATGTCGCTTATACAAATGCAAACAT  
CAATGATTTTGATGAGGACTATTTTGGGAGTGATGTCACTGTCCAAAGTAGTAATACAA  
CAGATGAAATAATTAGAGATGCATCTGGGGCAGTTATCGAAGAACAAATTACAATAA  
AAAAATGCAACGGAAAAATAAAAACCATGGAATACTTGAAAAAAATGAAAAATGA  
TCAAGACGTTTCGTTATAACCACGGATTCCGACGGTAACGAGTCCATTGTAGAGGAAGA  
TGTGCTCATGAAGACACTTTCCGATGGTACTGTTGCTCAAAGTTATGTTGCTGCTGATG  
CGGGAGCATATTCTCAGAGCGGGCCATACGTATCAAACAGTGGATACAGCACTCATCA  
AGGATATACGAGCGATTTACAGCACTAGTGCTGCAGTCCGTGCAGGAGCTGGTGCAGGT  
GCTGCCGCTGGTTCTGGTGCGGGTGCCGGAGCTGGTTATGGAGCTGCTTCTGGTGCTG  
GTGCCGGTGCTGGGGCTGGTGCCGGAGCTGGTTATGGAAGTGGTGCAGGTGCAGGTG  
CCGGAGCTGGTTATGGAGCTGGTGCAGGTGCAGGTGCCGGAGCTGGTTATGGGGCTG  
GTGCAGGTGCAGGTGCCGGAGCTGGTTATGGAGCTGGTGCAGGTGCAGGTGCCGGAG  
CTGGTTATGGGGCTGGTGCAGGTGCAGGTGCCGGAGCTGGTTATGGAGCTGGTGCGGG  
TGCCGGTGCCGGGGCTGGTTATGGAGCTGCCTCTGGTGCTGGTGCTGGCGCTGGGTAC  
GGACAAGGAGTAGGAAGCGGAGCTGCTTCTGGAGCTGGTGCAGGTGCAGGAGCAGG  
TTCTGCCGCTGGTTCTGGGGCAGGTGCCGGTGCTGGTACCGGTGCTGGTGCAGGTTAC  
GGAGCTGGTGCAGGTGCCGGTGCCGGAGCTGGTTATGGAGCTGCCTCTGGTACTGGA  
GCAGGTTATGGAGCTGGTGCCGGAGCTGGTTACGGAGGTGCCTCTGGTGCTGGTGCTG  
GTGCCGGTGCTGGGGCTGGAGCCGGTGCTGGTGCAGGTTATGGAAGTGGCGCTGGAT  
ACGGAGCAGGAGCCGGAGCAGGAGCCGGAGCAGGAGCTGGTGCTGGATACGGAGC  
AGGAGCTGGTGCTGGATACGGAGCAGGATATGGAGTAGGAGCTGGTGCTGGATACGG  
AGCAGGATACGGAGCAGGAGCTGGAAGCGGAGCTGCCTCTGGTGCTGGTTCAGGTGC  
CGGTGCTGGTTCAGGTGCCGGTGCTGGTTCAGGTGCCGGTGCTGGTTCAGGTGCCGGT  
GCCGGTTCAGGTGCTGGTGCTGGTTCAGGTGCTGGTGCTGGTTCAGGTGCTGGTGCTG  
GCTCAGGTGCTGGTGCTGGTTCAGGTACTGGTGCTGGTTCAGGAGCTGGTGCTGGATA  
CGGAGCAGGAGCTGGTGCTGGATACGGAGCAGGAGCAGGAAGTGGAGCTGCCTCTG  
GTGCCGGTGCTGGTTCAGGTGCAGGTGCTGGTTCAGGTGCTGGTGCTGGTTCAGGTGC  
TGGTGCTGGTTCAGGTGCTGGTGCTGGTTCAGGAGCTGGTGCTGGATACGGAGCAGGA  
GCTGGTGCTGGATACGGAGCAGGAGCTGGTGCTGGATACGGAGCAGGAGCTGGCGTT  
GGATACGGAGCAGGAGCTGGAAGCGGAGCTGCCTCTGGTGCTGGTGCTGGTTCAGGA  
GCCGGTGCTGGTTCAGGTGCTGGTGCTGGTTCAGGTGCTGGTGCTGGTTCAGGTGCTG  
GTGCTGGTTCAGGTGCCGGTGCTGGTTCAGGTGCTGGTGCTGGTTCAGGAGCTGGTGC  
TGGTTCAGGTGCTGGTGCTGGTTCAGGAGCTGGAGTTGGATACGGAGCAGGAGTTGGT  
GCTGGATACGGAGCAGGATATGGAGCAGGAGCTGGTGCTGGATACGGAGCAGGAGC

AGGAAGCGGAGCTGCCTCTGGTGCTGGTGCCGGTGCTGGAGCTGGTGCAGGAACAGG  
CTCTTCTGGATTTGGACCATATGTAGCAAATGGCGGATATAGCAGAAAGTGATGGCTACG  
AATACGCTTGGTTCGTCTGACTTTGGAAGCTGGAAGCGGAGCTGGTGCTGGTTCAGGTGC  
TGGTGCTGGTTCAGGTGCTGGCGCTGGCTCAGGTGCTGGTGCTGGTTCAGGTGCTGGT  
GCTGGTTCAGGAGCTGGAGCTGGATACGGAGCAGGAGTTGGTGTTGGATACGGAGCA  
GGATATGGAGCAGGAGCTGGTGCTGGATACGGAGCAGGAGCAGGAAGCGGAGCTGC  
CTCTGGTGCCGGTGCTGGTTCAGGTGCTGGTGCTGGTTCAGGTGCCGGTGCTGGTTCA  
GGTGCTGGTGCTGGTTCAGGTGCCGGTGCTGGTTCAGGTGCTGGTGCTGGCTCAGGTG  
CCGGTGCTGGTTCAGGTGCTGGTGCTGGTTCAGGTGCCGGTGCTGGTTCAGGTGCTGG  
TGCTGGTTCAGGTGCTGGTGTTGGCTCAGGTGCTGGTGCTGGTTCAGGTGCTGGTGCTG  
GTTACAGGAGCTGGTGCTGGATACGGAGCAGGAGCTGGTGCTGGATACGGAGCAGGAG  
CTGGTGCTGGATACGGAGCAGGATATGGAGTAGGAGCTGGTGCTGGATACGGAGCAG  
GAGCTGGAAGCGGAGCTGCCTCTGGTGCTGGTGCTGGTTCAGGTGCCGGTGCTGGTTC  
AGGTGCTGGTGCTGGTTCAGGTGCTGGTGCTGGTTCAGGAGCTGGAGCTGGTTCAGGT  
GCTGGTGCTGGTTCAGGTACTGGTGCAAGGCTCAGGTGCTGGTGCTGGTTCAGGATCTG  
GAGCTGGATACGGAGCAGGAGTTGGTGTTGGATACGGAGCAGGATATGGAGCAGGAG  
CTGGTGCTGGATACGGAGCAGGAGCAGGAAGCGGAGCTGCCTCAGGTGCCGGTGCTG  
GTTACAGGTGCTGGTGCTGGTTCAGGTGCCGGTGCTGGTTCAGGTGCTGGTGCTGGTTC  
AGGTGCTGGTGCTGGTTCAGGTGCTGGTGCTGGTTCAGGTGCTGGTGCTGGTTCAGGT  
GCTGGTGCTGGTTCAGGTGCTGGTGCTGGCTCAGGTGCTGGAGCTGGTTCAGGTGCTG  
GTGCTGGTTCAGGAGCTGGAGCTGGATACGGAGCAGGAGTTGGTGCTGGATACGGAG  
CAGGATATGGAGCAGGAGCTGGTGCTGGATACGGAGCAGGAGCTGGAAGCGGAGCT  
GCCTCTGGTGCTGGTTCAGGTGCCGGTGCTGGTTCAGGTGCCGGTGCTGGTGCTGGTT  
CAGGTGCTGGTGCTGGTTCAGGTGCTGGTGCTGGTTCAGGTGCTGGTGCTGGCTCAGG  
TGCTGGAGCTGGTTCAGGTGCTGGTGCTGGTTCAGGAGCTGGAGCTGGATACGGAGC  
AGGAGTTGGTGCTGGATACGGAGCAGGATATGGAGCAGGAGCTGGTGCTGGATACGG  
AGCAGGAGCAGGAAGCGGAGCTGCCTCTGGTGCCGGTGCTGGTTCAGGTGCTGGAGC  
TGGTTCAGGTGCCGGTGCTGGTTCAGGTGCTGGTGCTGGTTCAGGAGCTGGTGCTGGT  
TCAGGAGCTGGTGCTGGTTCAGGTGCTGGTGCTGGTTCAGGAGCTGGAGTTGGATACG  
GAGCAGGATATGGAGCAGGAGCTGGTGCTGGATACGGAGCAGGAGCAGGAAGCGGA  
GCTGCCTCTGGTGCTGGTGCCGGTGCTGGAGCTGGTGCAAGAACAGGCTCTTCTGGAT  
TTGGACCATATGTAGCACATGGCGGATATAGCGGCTACGAATACGCTTGGTCGTCAGA  
ATCTGACTTTGGAAGCTGGAAGCGGAGCTGGTGCTGGTTCAGGTGCTGGTGCTGGTTC  
GGTGCTGGTGCTGGCTCAGGTGCTGGTGCTGGTTCAGGAGCTGGATACGGAGCAGGA  
GTTGGTGCTGGATACGGAGCAGGATATGGAGCAGGAGCTGGTGCTGGATACGGAGCA  
GGAGCAGGAAGCGGAGCTGGCTCAGGTGCTGGTGCTGGTTCAGGAGCTGGAGCTGGT  
TCAGGTGCCGGTGCTGGTTCAGGTGCTGGTGCTGGTTCAGGAGCTGGTGCTGGTTCAG  
GTGCTGGTGCTGGTTCAGGAGCTGGTGCTGGTTCAGGTGCCGGTGCTGGTTCAGGTGC  
TGGTGCTGGATACGGAGCAGGATATGGAGCAGGAGCTGGTGCTGGATACGGAGCAGG  
AGCAGGAAGCGGAGCTGGCTCAGGTGCTGGTGCTGGTTCAGGTGCTGGTGCTGGTTC  
AGGAGCTGGAGCTGGTTCAGGTGCCGGTGCTGGTTCAGGTGCTGGTGCTGGTTCAGGT  
GCTGGTGCTGGCTCAGGTGCTGGTGCTGGTTCAGGAGCTGGAGCTGGATACGGAGCA  
GGAGTTGGTGCTGGATACGGAGCAGGATATGGAGCAGGAGCTGGTGCTGGATACGGA  
GCAGGAGCAGGAAGCGGAGCTGGCTCAGGTGCTGGTGCTGGTTCAGGAGCTGGAGC

TGGTTCAGGTGCTGGTGCTGGTTCAGGTGCCGGTGTTGGTTCAGGTGCTGGTGCTGGTT  
CAGGAGCTGGTGCTGGTTCAGGTGCCGGTGCTGGTTCAGGTGCTGGTGCTGGATACGG  
AGCAGGATATGGAGCAGGAGCTGGTGCTGGATACGGAGCAGGAGCAGGAAGCGGAG  
CTGGCTCAGGTGCTGGTGCTGGTTCAGGTGCTGGTGCTGGTTCAGGAGCTGGAGCTGG  
TTCAGGTGCCGGTGCTGGTTCAGGTGCTGGTGCTGGTTCAGGAGCTGGTGCTGGTTCA  
GGTGCTGGTGCTGGTTCAGGAGCTGGAGTTGGATACGGAGCAGGAGTTGGTGCTGGA  
TACGGAGCAGGATATGGAGCAGGAGCTGGTGCTGGATACGGAGCAGGAGCAGGAAG  
CGGAGCTGCCTCTGGTGCTGGTGCCGGTGCTGGAGCTGGTGCAGGAACAGGCTCTTCT  
GGATTTGGACCATATGTAGCAAATGGCGGATATAGCGGCTACGAATACGCTTGGTCGTC  
AGAATCTGACTTTGGAAGCTGGAAGCGGAGCTGGTGCTGGTTCAGGTGCTGGTGCTGGT  
TCAGGTGCTGGTGCTGGCTCAGGTGCTGGTGCTGGTTCAGGAGCTGGAGCTGGATACG  
GAGCAGGATATGGAGCAGGAGCTGGTGCTGGATACGGAGCAGGAGCAGGAAGCGGA  
GCTGGCTCAGGTGCTGGTGCTGGTTCAGGAGCTGGAGCTGGTTCAGGTGCCGGTGCTG  
GTTACAGGTGCTGGTGCTGGTTCAGGTGCCGGTGCTGGTTCAGGTGCTGGTGCTGGTTC  
AGGAGCTGGTGCTGGTTCAGGTGCCGGTCTGGTTCAGGAGCTGGTGCTGGTTCAGGT  
GCTGGTGCTGGTTCAGGAGCTGGAGCTGGATACGGAGCAGGAGTTGGTGCTGGATAC  
GGAGTAGGATATGGAGCAGGAGCTGGTGCTGGATACGGAGCAGGAGCAGGAAGCGG  
AGCTGCCTCTGGTGCTGGTGCCGGTGCTGGAGCTGGTGCAGGAACAGGCTCTTCTGGA  
TTTGGACCATATGTAGCACATGGCGGATATAGCGGCTACGAATACGCTTGGTCGTCAGA  
ATCTGACTTTGGAAGCTGGAAGCGGAGCTGGTGCTGGTTCAGGTGCTGGTGCTGGTTCA  
GGTGCTGGTGCTGGCTCAGGTGCTGGTGCTGGTTCAGGAGCTGGTGCTGGTTCAGGTG  
CTGGTGCTGGTTCAGGAGCTGGAGCTGGATACGGAGCAGGAGTTGGTGCTGGATACG  
GAGCAGGATATGGAGCAGGAGCTGGTGCTGGATACGGAGCTGGAGCAGGAAGCGGA  
GCTGCCTCTGGTGCCGGTGCTGGTTCAGGTGCTGGTGCTGGTTCAGGTGCCGGTGCTG  
GTTACAGGTGCTGGTGCTGGTTCAGGTGCTGGTGCTGGTTCAGGTGCTGGTGCTGGTTC  
AGGTGCTGGTGCTGGTTCAGGAGCTGGTGCTGGTTCAGGAGCTGGTGCTGGTTCAGGT  
GCCGGTGCTGGTTCAGGAGCTGGAGCAGGATATGGAGCAGGAGCTGGTGCTGGATAC  
GGAGCAGGAGCAGGAAGCGGAGCTGGCTCAGGTGCTGGTGCTGGTTCAGGTGCTGGT  
GCTGGTTCAGGAGCTGGAGCTGGTTCAGGTGCCGGTGCTGGTTCAGGTGCTGGTGCTG  
GTTACAGGTGCCGGTCTGGTTCAGGAGCTGGTGCTGGTTCAGGTGCTGGTGCTGGTTC  
AGGAGCTGGAGCTGGATACGGAGCAGGAGTTGGTGCTGGATACGGAGCAGGATATGG  
AGCAGGAGCTGGTGCTGGATACGGAGCAGGAGCAGGAAGCGGAGCTGGCTCAGGTG  
CCGGTGCTGGTTCAGGAGCTGGAGCAGGATATGGAGCAGGAGCTGGTGCTGGATACG  
GAGCAGGATATGGAGCAGGAGCTGGTGCTGGATACGGAGCAGGAGCAGGAAGCGGA  
GCTGGCTCAGGTGCTGGTGCTGGTTCAGGTGCTGGTGCTGGTTCAGGTGCTGGTGCTG  
GTTACAGGAGCTGGAGCTGGTTCAGGTGCCGGTGCTGGTTCAGGTGCTGGTGCTGGTTC  
AGGTGCCGGTCTGGTTCAGGTGCTGGTGCTGGTTCAGGAGCTGGAGCTGGTTCAGGT  
GCCGGTGCTGGTTCAGGTGCTGGTGCTGGTTCAGGTGCTGGTGCTGGTTCAGGAGCTG  
GAGCTGGATACGGAGCAGGAGTTGGTGCTGGATACGGAGCAGGATATGGAGCAGGAG  
CTGGTGCTGGATACGGAGCAGGAGCAGGAAGCGGTGCTGGTTCAGGTGCTGGTGCTG  
GTTACAGGTGCTGGTGCTGGTTCAGGTGCTGGTGCTGGTTCAGGAGCTGGTGCTGGATA  
TGGAGCTGGATACGGAGCAGGAGCTGGAAGCGGAGCTGCCTCTGGTGCTGGTGCCGG  
TGCTGGAGCTGGTGCAAGAACAGGCTCTTCTGGATTTGGACCATATGTAGCACATGGC  
GGATATAGCGGCTACGAATACGCTTGGTCGTCAGAATCTGACTTTGGAAGCTGGAAGCG

GAGCTGGTGCTGGTTCAGGTGCTGGTGCTGGCGCAGGTGCTGGTGCTGGTTCAGGAGC  
TGGAGCTGGATACGGAGCAGGAGTTGGTGCTGGATACGGAGCAGGATATGGAGCAGG  
AGCTGGTGCTGGATACGGAGCAGGAGCAGGAAGCGGAAGTGGCTCAGGTGCTGGTG  
CTGGTTCAGGAGCTGGAGCTGGATACGGAGCAGGAGTTGGTGCTGGATACGGAGCAG  
GAGCAGGAAGCGGAGCTGCCTTTGGTGCCGGTGCTGGTGCTGGTGCTGGTTCAGGTG  
CCGGTGCTGGTTCAGGTGCTGGTGCTGGTTCAGGTGCTGGTGCTGGTTCAGGTGCTGG  
TGCTGGTTCAGGAGCTGGTGCTGGATACGGAGCAGGGTACGGAGCAGGAGTTGGTG  
TGGATACGGAGCAGGAGCTGGAAGCGGAGCTGCCTCTGGTGCCGGTGCTGGTTCAGG  
TGCTGGTGCTGGTTCAGGTGCCGGTGCTGGTTCAGGTGCTGGTGCTGGCTCAGGTGCT  
GGTGCTGGTTCAGGAGCTGGAGCTGGATACGGAGCAGGAGTTGGTGCTGGATACGGA  
GCAGGATATGGAGCAGGAGCTGGTGCTGGATACGGAGCTGGAGCAGGAAGCGGAGC  
TGCCTCTGGTGCCGGTGCTGGTTCAGGTGCTGGTGCTGGTGCTGGTTCAGGTGCCGGT  
GCTGGTTCAGGTGCTGGTGCTGGTTCAGGTGCTGGTGCTGGTTCAGGTGCTGGTTCAG  
GTGCTGGTGCTGGTTCAGGTGCCGGTGCTGGTTCAGGAGCTGGTGCTGGATACGGAGC  
AGGAGCAGGAAGCGGAGCTGCCTCTGGTGCTGGTGCCGGTGCTGGAGCTGGTGCAAG  
AACAGGCTCTTCTGGATTTGGACCATATGTAGCAAATGGCGGATATAGCGGCTACGAA  
TACGCTTGGTCGTCAGAATCTGACTTTGGAAGTGGAGCGGAGCTGGTGCTGGTTCAG  
GTGCTGGTGCTGGTTCAGGTGCTGGTGCTGGCTCAGGTGCTGGTGCTGGTTCAGGAGC  
TGGAGCTGGATACAGAGCAGGAGTTGGTGCTGGATACGGAGCAGGATATGGAGCAGG  
AGCTGGTGCTGGATACGGAGCAGGAGCAGGAAGCGGAGCTGGCTCAGGTGCTGGTG  
CTGGTTCAGGAGCTGGAGCTGGTTCAGGTGCCGGTGCTGGTTCAGGTGCTGGTGCTGG  
TTCAGGTGCCGGTGCTGGTTCAGGTGCTGGGGCTGGTTCAGGAGCTGGTGCTGGATAC  
GGAGCAGGAGCAGGAAGCGGAGCTGCCTCTGGTGCCGGTGCTGGTTCAGGTGCTGGT  
GCTGGTTCAGGTGCCGGTGCTGGTTCAGGTGCTGGTGCTGGTTCAGGAGCTGGTGCTG  
GTTTCAGGTGCTGGTGCTGGTTCAGGAGCTGGAGCTGGATACGGAGCAGGAGTTGGTG  
CTGGATACGGAGTAGGATATGGAGCAGGAGCTGGTGCTGGATACGGAGCAGGAGCAG  
GAAGCGGAGCTGGCTCAGGTGCTGGTGCTGGTTCAGGTGCTGGTGCTGGTTCAGGTGC  
CGGTGCTGGTTCAGGTGCTGGTGCTGGTTCAGGTGCCGGTTCAGGTGCTGGTGCTGGT  
TCAGGAGCTGGTGCTGGTTCAGGTGCTGGTGCTGGTTCAGGTGCTGGTTCAGGTGCTG  
GTGCTGGCTCAGGTGCTGGTGCTGGATACGGAGTAGGATATGGAGCAGGAGCTGGTG  
CTGGATACGGAGCAGGAGCAGGAAGCGGAGCTGGCTCAGGTGCTGGTGCTGGGTCA  
GGTGCCGGTGCTGGTTCAGGTGCTGGTGCTGGTTCAGGTGCCGGTTCAGGTGCTGGTG  
CTGGTTCAGGAGCTGGTGCTGGTTCAGGTGCTGGTGCTGGTTCAGGAGCTGGAGCTGG  
ATACGGAGCAGGAGTTGGTGCTGGATACGGAGTAGGATATGGAGCAGGAGCTGGTG  
TGGATACGGAGCAGGAGCAGGAAGCGGAGCTGGCTCAGGTGCTGGTGCTGGTTCAGG  
TGCTGGTGCTGGTTCAGGTGCCGGTGCTGGTTCAGGTGCTGGTGCTGGTTCAGGAGCT  
GGTGCTGGTTCAGGTGCCGGTGCTGGTTCAGGTGCTGGTGCTGGTTCAGGTGCCGGT  
CAGGTGCTGGTGCTGGTTCAGGAGCTGGTGCTGGTTCAGGTGCCGGTGCTGGTTCAGG  
TGCTGGTGCTGGTTCAGGTGCCGGTTCAGGTGCTGGTGCTGGTTCAGGAGCTGGTGCT  
GGTTCAGGTGCTGGTGCTGGTTCAGGAGCTGGAGCTGGATACGGAGCAGGAGTTGGT  
GCTGGATACGGAGTAGGATATGGAGCAGGAGTTGGTGCTGGATACGGAGCAGGAGCA  
GGAAGCGGAGCTGCCTCTGGTGCCGGTGCTGGTTCAGGTGCTGGTGCTGGTGCTGGT  
CAGGTGCCGGTGCTGGTTCAGGTGCTGGTGCTGGTTCAGGTGCTGGTGCTGGTTCAGG  
TGCTGGTGCTGGTTCAGGTGCTGGTGCTGGTTCAGGAGCTGGTGCTGGATACGGAGCA

GGGTACGGAGCAGGAGTTGGTGCTGGATACGGAGCAGGAGCTGGCGTTGGATACGGA  
GCAGGAGCTGGCGCTGGATACGGAGCAGGAGCTGGAAGCGGAGCTGCCTCTGGTGC  
CGGTGCTGGTGCTGGTTCAGGTGCCGGTGCTGGTACAGGTGCTGGGGCTGGTTCAGGA  
GCTGGTGCTGGATACGGAGCAGGAGCAGGAAGCGGAGCTGCCTCTGGTGCTGGTGCC  
GGTGCTGGAGCTGGTGCAGGAACAGGCTCTTCTGGATTTGGACCATATGTAGCAAATG  
GCGGATATAGCGGCTACGAATACGCTTGGTCGTCAGAATCTGACTTTGGAAGCTGGAAG  
CGGAGCTGGTGCTGGTTCAGGTGCTGGTGCTGGTTCAGGTGCTGGTGCTGGCTCAGGT  
GCTGGTGCTGGTTCAGGAGCTGGAGCTGGATACGGAGCAGGAGTTGGTGCTGGATAC  
GGAGCAGGAGCAGGAAGCGGAGCTGGCTCAGGTGCTGGTGCTGGTTCAGGAGCTGG  
AGCTGGTTCAGGTGCTGGTGCTGGTTCAGGAGCTGGTGCTGGTTCAGGAGCTGGAGCT  
GGATACGGAGCAGGAGCAGGAAGCGGAAGCTGGCTCAGGTGCTGGTGCTGGTTCAGGT  
GCTGGTGCTGGTTCAGGTGCCGGTGCTGGTTCAGGTGCTGGTGCTGGTTCAGGAGCTG  
GTGCTGGTTCAGGTGCTGGTGCTGGTTCAGGAGTTGGTGCTGGATACGGAGTAGGATA  
TGAGCAGGAGCTGGTGCTGGATACGGAGTAGGATATGGAGCAGGAGCTGGTGCTGG  
ATACGGAGCAGGAGCAGGAAGCGGAAGCTGGCTCAGGTGCTGGTGCTGGTTCAGGTGC  
TGGTGCTGGTTCAGGTGCCGGTGCTGGTTCAGGTGCTGGTGCTGGTTCAGGAGCTGGT  
GCTGGTTCAGGTGCTGGTGCTGGTTCAGGAGCTGGAGCTGGATACGGAGCAGGAGTT  
GGTGCTGGATACGGAGTAGGATATGGAGCAGGAGCTGGTGCTGGATACGGAGCAGGA  
GCAGGAAGCGGAGCTGGCTCAGGTGCTGGTGCTGGTTCAGGTGCTGGTGCTGGTTCAG  
GGTGCCGGTGCTGGTTCAGGTGCTGGTGCTGGTTCAGGTGCCGGTTCAGGTGCTGGTG  
CTGGTTCAGGAGCTGGTGCTGGTTCAGGTGCTGGTGCTGGTTCAGGTGCTGGTTCAGG  
TGCTGGTGCTGGCTCAGGTGCTGGTGCTGGATACGGAGTAGGATATGGAGCAGGAGCT  
GGTGCTGGATACGGAGCAGGAGCAGGAAGCGGAGCTGGCTCAGGTGCTGGTGCTGG  
GTCAGGTGCCGGTGCTGGTTCAGGTGCTGGTGCTGGTTCAGGTGCCGGTTCAGGTGCT  
GGTGCTGGTTCAGGAGCTGGTGCTGGTTCAGGTGCTGGTGCTGGTTCAGGAGCTGGAG  
CTGGATACGGAGCAGGAGTTGGTGCTGGATACGGAGTAGGATATGGAGCAGGAGCTG  
GTGCTGGATACGGAGCAGGAGCAGGAAGCGGAGCTGGCTCAGGTGCTGGTGCTGGT  
CAGGTGCTGGTGCTGGTTCAGGTGCCGGTGCTGGTTCAGGTGCTGGTGCTGGTTCAGG  
AGCTGGTGCTGGTTCAGGTGCCGGTGCTGGTTCAGGTGCTGGTGCTGGTTCAGGTGCC  
GGTTCAGGTGCTGGTGCTGGTTCAGGAGCTGGTGCTGGTTCAGGTGCTGGTGCTGGT  
CAGGAGCTGGAGCTGGATACGGAGCAGGAGTTGGTGCTGGATACGGAGTAGGATATG  
GAGCAGGAGCTGGTGCTGGATACGGAGCAGGAGCAGGAAGCGGAGCTGCCTCTGGT  
GCTGGTGCCGGTGCTGGAGCTGGTGCAAGAACAGGCTCTTCTGGATTTGGACCATATG  
TAGCAAATGGCGGATATAGCGGCTACGAATACGCTTGGTCGTCAGAATCTGACTTTGG  
AACTGGAAGCGGAGCTGGTGCTGGTTCAGGTGCTGGTGCTGGTTCAGGAGCTGGTG  
TGATACGGAGCAGGGTACGGAGCAGGAGTTGGTGCTGGATACGGAGCAGGAGCTG  
GCGTTGGATACGGAGCAGGAGCTGGCGCTGGATACGGAGCAGGAGCTGGAAGCGGA  
GCTGCCTCTGGTGCCGGTGCTGGTGCCGGTGCTGGTGCTGGTTCAGGTGCCGGTGCTG  
GTTACAGGTGCTGGTGCTGGTGCTGGTTCAGGAGCTGGTGCTGGATACGGAGCAGGGTA  
CGGAATAGGAGTTGGTGCTGGATACGGAGCAGGAGCTGGCGTTGGATACGGAGCAGG  
AGCTGGCGCTGGATACGGAGCAGGAGCTGGAAGCGGAGCTGCCTCTGGTGCCGGTG  
TGTTTCAGGTGCTGGTGCTGGTTCAGGTGCTGGTGCTGGTTCAGGTGCTGGTGCTGGT  
CAGGTGCTGGTGCTGGTTCAGGTGCTGGTGCTGGTTCAGGAGCTGGTGCTGGATACGG  
AGCAGGGTACGGAGCAGGAGTTGGTGCTGGATACGGAGCAGGAGCTGGCGTTGGATA

CGGAGCAGGAGCTGGCGCTGGATACGGAGCAGGAGCTGGAAGCGGAGCTGCCTCTG  
GTGCCGGTGCTGGTGCCGGTGCTGGTGCTGGTGCTGGTTCAGGTGCCGGTGCTGGTTC  
AGGTGCTGGTGCTGGTTCAGGTGCTGGTGCTGGTTCAGGAGCTGGTGCTGGTTCAGGT  
GCTGGTGCTGGTTCAGGTGCTGGTGCTGGTTCAGGTGCTGGTGCTGGCTCAGGTGCTG  
GTGCTGGTTCAGGAGCTGGAGCTGGATACGGAGCAGGAGTTGGTGCTGGATACGGAG  
CAGGATATGGAGGAGCTGGTGCTGGATACGGAGCAGGAGCAGGAAGCGGAGCTGCC  
TCTGGTGCCGGTGCTGGTTCAGGTGCTGGTGCTGGTTCAGGAGCTGGTGCTGGTTCAG  
GTGCTGGTGCTGGTTCAGGTGCTGGGGCTGGTTCAGGTGCTGGTGCTGGATACGGAGC  
AGGAGCAGGAAGCGGAGCTGCCTCTGGTGCTGGTGCCGGTGCTGGAGCTGGTGCAAG  
AACAGGCTCTTCTGGATTTGGACCATATGTAAATGGCGGATATAGCGGCTACGAATACG  
CTTGGTCGTCAGAATCTGACTTTGGAAGTGAAGCGGAGCTGGTGCTGGCTCAGGTGC  
TGGTGCTGGTTCAGGAGCTGGAGCTGGATACGGAGCAGGAGTTGGTGCTGGATACGG  
AGCAGGATATGGAGCAGGAGCTGGTGCTGGATACGGAGCAGGAGCAGGAAGCGGAG  
CTGCCTCTGGTGCCGGTGCTGGTTCAGGTGCTGGTGCTGGTTCAGGTGCCGGTGCTGG  
TTCAGGTGCTGGTGCTGGTTCGGGTGCTGGTTCAGGTGCTGGTGCTGGTTCAGGTGCTG  
GTGCTGGCTCAGGTGCTGGTGCTGGTTCAGGTGCTGGTGCTGGTTCAGGAGCTGGAGC  
TGGATACGGAGCAGGAGTTGGTGTTGGATACGGAGCAGGATATGGAGCAGGAGCTGG  
TGCTGGATACGGAGCAGGAGCAGGAAGCGGAGCTGCCTCTGGCGCCGGTGCTGGTTC  
AGGTGCTGGTGCTGGTGCTGGTTCAGGTGCCGGTGCTGGTTCAGGTGCTGGTGCTGGT  
TCAGGTGCTGGTGCTGGTTCAGGTGCTGGTGCTGGTTCAGGTGCTGGTGCTGGTTCAG  
GTGCTGGTTCAGGTGCTGGTGCTGGTTCAGGAGCTGGTGCTGGATACGGAGCAGGGTA  
CGGAGCAGGAGTTGGTGCTGGATACGGAGCAGGAGCTGGCGTTGGATACGGAGCAG  
GAGCTGGCGCTGGATACGGAGCAGGAGCTGGAAGCGGAGCTGCCTCTGGTGCCGGTG  
CTGGTTCAGTTCTGGTGCTGGTTCAGGTGCCGGTGCTGGTTCAGGTGCTGGTGCTGGT  
TCAGGTGCTGGTGCTGGTGCTGGTTCAGGTGCTGGGGCTGGTTCAGGAGCTGGTGCTG  
GTTACAGGAGCTGGTGCTGGATACGGAGCAGGGTACGGAGCAGGAGCAGGAAGCGGA  
GCTGCCTCTGGTGCTGGTGCCGGTGCTGGAGCTGGTGCAAGAACAGGCTCTTCTGGAT  
TTGGACCATATGTAGCAAATGGCGGATATAGCGGCTACGAATACGCTTGGTCGTCAGA  
ATCTGACTTTGGAAGTGAAGCGGAGCTGGTGCTGGCTCAGGTGCTGGTGCTGGTTCAG  
GGAGCTGGAGCTGGATACGGAGCAGGAGTTGGTGCTGGTTACGGAGCAGGATATGGA  
GCAGGAGCTGGTGCTGGATACGGAGCAGGAGCAGGAAGCGGAGCTGCCTCAGGTGC  
CGGTGCTGGTTCAGGTGCTGGTGCTGGTTCAGGTGCCGGTGCTGGTTCAGGTGCTGGT  
GCTGGTTCAGGAGCTGGTGCTGGTTCAGGTGCTGGTGCTGGTTCAGGTGCTGGTGCTG  
GTTACAGGTGCTGGTGCTGGTTCAGGAGCTGGTGCTGGATACGGAGCAGGGTACGGAG  
CAGGAGTTGGTGCTGGATACGGAGCAGGAGCTGGCGTTGGATACGGAGCAGGAGCTG  
GCGCTGGATACGGAGCAGGAGCTGGAAGCGGAGCTGCCTCTGGTGCCGGTGCTGGTT  
CAGGTTCTGGTGCTGGTGCTGGTTCAGGTTCTGGTGCTGGTTCAGGTGCTGGTGCTGGT  
TCAGGTGCTGGTGCTGGTTCAGGTGCTGGTGCTGGTTCAGGAGCTGGTGCTGGTTCAG  
GTGCTGGTGCTGGTTCAGGTGCTGGTGCTGGTTCAGGTGCTGGTGCTGGATACGGAGC  
AGGGTACGGAATAGGAGTTGGTGCTGGATACGGAGCAGGAGCTGGCGTTGGATACGG  
AGCAGGAGCTGGCGCTGGATACGGAGCAGGAGCTGGAAGCGGAGCTGCCTCTGGTG  
CCGGTGCTGGTTCAGGTGCTGGTGCTGGTTCAGGAGCTGGTGCTGGTTCAGGTGCTGG  
TGCTGGTTCAGGTGCTGGTGCTGGTTCAGGTGCTGGTGCTGGTTCAGGAGCTGGTGCT  
GGTTCAGGTGCTGGTGCTGGTTCAGGTGCTGGTGCTGGTTCAGGAGCTGGTGCTGGAT



ACGGAGCAGGAGCTGGCGTTGGATACGGAGCAGGAGCTGGAAGCGGAGCTGCCTCT  
GGTGCTGGTGCTGGTTCAGGTGCTGGTGCTGGTTCAGGTGCTGGTGCTGGTTCAGGTG  
CTGGTGCTGGTTCAGGTGCTGGTGCTGGTTCAGGTGCTGGTGCTGGTTCAGGTGCTGGT  
GCTGGTTCAGGTGCTGGTTCAGGTGCTGGTGCTGGTTCAGGTGCTGGTGCTGGATACG  
GAGCAGGGTACGGAGCAGGAGTTGGTGCTGGATACGGAGCAGGAGCTGGCGTTGGAT  
ACGGAGCAGGATATGGAGTAGGAGCTGGTGCTGGATACGGAGCAGGAGCAGGAAGC  
GGAGCTGCCTCTGGTGCTGGTGCTGGTTCAGGTGCTGGTGCTGGTTCAGGTGCTGGTG  
CTGGTTCAGGTGCTGGTGCTGGTTCAGGTGCTGGTGCTGGTTCAGGTGCTGGTTCAGG  
AGCTGGTGCTGGATACGGAGCAGGAGCTGGCGTTGGATACGGAGCAGGAGCTGGCGC  
TGGATACGGAGCAGGAGCTGGAAGCGGAGCTGCCTCTGGTGCTGGTGCTGGTGCCGG  
TGCTGGTTCAGGTGCTGGTGCTGGTTCAGGTGCTGGTGCTGGTTCAGGTGCTGGTTCA  
GGTGCTGGTGCTGGTTCAGGAGCTGGTGCTGGATACGGAGCAGGAGCTGGAAGCGGA  
GCTGCCTCTGGTGCCGGTGCTGGTTCAGGTGCTGGTGCTGGTGCTGGTGCCGGTGCTG  
GTGCTGGTTCAGGAGCTGGTGCTGGTTCAGGAGCTGGTGCTGGATACGGAGCAGGAG  
CAGGAAGTGAGCTGCCTCTGGTGCTGGTGCTGGAGCTGGTGCAAGAACAGGCTCTT  
CTGGATTTGGACCATATGTAGCAAATGGCGGATATAGCAGACGTGAAGGCTACGAATA  
CGCTTGGTCGTCAAATCTGACTTTGAACTGGAAGCGGTGCTGCCTCTGGTGCTGGT  
GCTGGTGCTGGTTCAGGTGCTGGTGCTGGTTCAGGTGCCGGTGCTGGTTCAGGTGCTG  
GTGCTGGTTCAGGTGCCGGTGCTGGTGCTAGCGTCAGTTACGGAGCTGGCAGGGGATA  
CGGACAAGGTGCAGGAAGTGACGCTTCCTCTGTGTCATCTGCTTCATCTCGCAGTTAC  
GACTATTCTCGTCGTAACGTCCGCAAAAACGTGGAATTCCTAGAAGACAACACTAGTTG  
TTAAATTCAGAGCACTGCCTTGTGTGAATTGCTAA

The consensus sequence contains two exons and one intron. The black and gray letters are exons and introns, respectively.

**Supplementary Table S1** | Primers used in this study

| Primer name     | Sequence (5' to 3')        |
|-----------------|----------------------------|
| lw-Cpf1-up-F1   | TTTGAATAAGTGCTTAATTGCAAG   |
| lw-Cpf1-up-R1   | CGTAACTACAACCTACAGTGGAG    |
| lw-Cpf1-up-F2   | GTCGTCTAATGCAAAGATTATTGG   |
| lw-Cpf1-up-R2   | CTGGAGAATGCCTTGGATG        |
| lw-Cpf1-down-F1 | AACTGTGGAATTCCTAGAAGACAA   |
| lw-Cpf1-down-R1 | ATATCTACACCCACAACCTTTTAGCG |
| lw-Cpf1-down-F2 | CCCGGTCTCAGGAGACATTAG      |
| lw-Cpf1-down-R2 | CGTCGAAAACACAGGACATTG      |

**Supplementary Table S2** | Called sites methylated on the reference gene

| chromosome | start    | end      | num_motifs_in_group | called_sites | called_sites_methylated | methylated_frequency | group_sequence                          |
|------------|----------|----------|---------------------|--------------|-------------------------|----------------------|-----------------------------------------|
| Bomo_Ch25  | 10354653 | 10354653 | 1                   | 32           | 4                       | 0.125                | AAATCCGAAAT                             |
| Bomo_Ch25  | 10354715 | 10354715 | 1                   | 38           | 2                       | 0.053                | ATTAACGAAAA                             |
| Bomo_Ch25  | 10354744 | 10354744 | 1                   | 44           | 1                       | 0.023                | CAGGACGAAGT                             |
| Bomo_Ch25  | 10354849 | 10354879 | 6                   | 480          | 0                       | 0                    | TTTGCGGACGTTACGACGAGAATAGTCGTAACGCGAGAT |
| Bomo_Ch25  | 10354928 | 10354928 | 1                   | 41           | 2                       | 0.049                | TTGTCCGTATC                             |
| Bomo_Ch25  | 10354946 | 10354955 | 2                   | 98           | 4                       | 0.041                | AGCTCCGTAACGACGCTAC                     |
| Bomo_Ch25  | 10354970 | 10354970 | 1                   | 52           | 4                       | 0.077                | <u>AGCACCGGCAC</u>                      |
| Bomo_Ch25  | 10355006 | 10355006 | 1                   | 50           | 3                       | 0.06                 | <u>AGCACCGGCAC</u>                      |
| Bomo_Ch25  | 10355066 | 10355066 | 1                   | 49           | 1                       | 0.02                 | AGCACCGCTTC                             |
| Bomo_Ch25  | 10355094 | 10355108 | 3                   | 219          | 0                       | 0                    | TTTGACGACCAAGCGTATTCGTAGC               |
| Bomo_Ch25  | 10355119 | 10355119 | 1                   | 29           | 1                       | 0.034                | CTTCACGTCTG                             |
| Bomo_Ch25  | 10355132 | 10355132 | 1                   | 22           | 1                       | 0.045                | <u>ATATCCGCCAT</u>                      |
| Bomo_Ch25  | 10355228 | 10355228 | 1                   | 32           | 2                       | 0.062                | <u>TGCTCCGTATC</u>                      |
| Bomo_Ch25  | 10355282 | 10355282 | 1                   | 50           | 0                       | 0                    | <u>AGCACCGGCAC</u>                      |
| Bomo_Ch25  | 10355318 | 10355318 | 1                   | 47           | 0                       | 0                    | <u>AGCACCGGCAC</u>                      |
| Bomo_Ch25  | 10355336 | 10355336 | 1                   | 40           | 1                       | 0.025                | <u>AGCTCCGCTTC</u>                      |
| Bomo_Ch25  | 10355354 | 10355354 | 1                   | 35           | 0                       | 0                    | <u>TGCTCCGTATC</u>                      |
| Bomo_Ch25  | 10355450 | 10355450 | 1                   | 49           | 0                       | 0                    | <u>AGCACCGGCAC</u>                      |
| Bomo_Ch25  | 10355480 | 10355480 | 1                   | 38           | 2                       | 0.053                | <u>AGCTCCGCTTC</u>                      |
| Bomo_Ch25  | 10355498 | 10355507 | 2                   | 124          | 4                       | 0.032                | <u>TGCTCCGTATC</u> CAGCGCCAG            |
| Bomo_Ch25  | 10355522 | 10355531 | 2                   | 148          | 0                       | 0                    | <u>TGCTCCGTATC</u> CAACGCCAG            |
| Bomo_Ch25  | 10355546 | 10355546 | 1                   | 36           | 0                       | 0                    | <u>TGCTCCGTATC</u>                      |
| Bomo_Ch25  | 10355678 | 10355678 | 1                   | 48           | 4                       | 0.083                | <u>AGCTCCGCTTC</u>                      |

|           |          |          |   |     |    |       |                                       |
|-----------|----------|----------|---|-----|----|-------|---------------------------------------|
| Bomo_Ch25 | 10355696 | 10355696 | 1 | 39  | 0  | 0     | <a href="#">TGCTCCGTATC</a>           |
| Bomo_Ch25 | 10355732 | 10355741 | 2 | 128 | 0  | 0     | <a href="#">TGCTCCGTATC</a> CAACGCCAG |
| Bomo_Ch25 | 10355756 | 10355756 | 1 | 40  | 0  | 0     | <a href="#">TGCTCCGTATC</a>           |
| Bomo_Ch25 | 10355780 | 10355780 | 1 | 30  | 0  | 0     | <a href="#">TGCTCCGTACC</a>           |
| Bomo_Ch25 | 10355792 | 10355792 | 1 | 33  | 0  | 0     | <a href="#">TGCTCCGTATC</a>           |
| Bomo_Ch25 | 10355978 | 10355978 | 1 | 39  | 4  | 0.103 | <a href="#">AGCTCCGCTTC</a>           |
| Bomo_Ch25 | 10355996 | 10356005 | 2 | 138 | 2  | 0.014 | <a href="#">TGCTCCGTATC</a> CAACGCCAG |
| Bomo_Ch25 | 10356020 | 10356020 | 1 | 41  | 0  | 0     | <a href="#">TGCTCCGTATC</a>           |
| Bomo_Ch25 | 10356194 | 10356194 | 1 | 56  | 0  | 0     | <a href="#">AGCACCGGCAC</a>           |
| Bomo_Ch25 | 10356212 | 10356212 | 1 | 36  | 1  | 0.028 | <a href="#">AGCTCCGCTTC</a>           |
| Bomo_Ch25 | 10356230 | 10356239 | 2 | 126 | 4  | 0.032 | <a href="#">TGCTCCGTATC</a> CAGCGCCAG |
| Bomo_Ch25 | 10356254 | 10356263 | 2 | 132 | 0  | 0     | <a href="#">TGCTCCGTATC</a> CAACGCCAG |
| Bomo_Ch25 | 10356278 | 10356278 | 1 | 39  | 2  | 0.051 | <a href="#">TGCTCCGTATC</a>           |
| Bomo_Ch25 | 10356302 | 10356302 | 1 | 34  | 1  | 0.029 | TATTCGGTACC                           |
| Bomo_Ch25 | 10356314 | 10356314 | 1 | 38  | 1  | 0.026 | <a href="#">TGCTCCGTATC</a>           |
| Bomo_Ch25 | 10356494 | 10356494 | 1 | 49  | 1  | 0.02  | <a href="#">AGCACCGGCAC</a>           |
| Bomo_Ch25 | 10356512 | 10356512 | 1 | 45  | 4  | 0.089 | <a href="#">AGCTCCGCTTC</a>           |
| Bomo_Ch25 | 10356530 | 10356539 | 2 | 138 | 14 | 0.101 | <a href="#">TGCTCCGTATC</a> CAGCGCCAG |
| Bomo_Ch25 | 10356554 | 10356563 | 2 | 142 | 0  | 0     | <a href="#">TGCTCCGTATC</a> CAACGCCAG |
| Bomo_Ch25 | 10356578 | 10356578 | 1 | 44  | 1  | 0.023 | <a href="#">TGCTCCGTATC</a>           |
| Bomo_Ch25 | 10356602 | 10356602 | 1 | 39  | 3  | 0.077 | <a href="#">TGCTCCGTACC</a>           |
| Bomo_Ch25 | 10356614 | 10356614 | 1 | 39  | 2  | 0.051 | <a href="#">TGCTCCGTATC</a>           |
| Bomo_Ch25 | 10356734 | 10356734 | 1 | 44  | 0  | 0     | <a href="#">AGCACCGGCAC</a>           |
| Bomo_Ch25 | 10356770 | 10356770 | 1 | 54  | 0  | 0     | <a href="#">AGCACCGGCAC</a>           |
| Bomo_Ch25 | 10356788 | 10356788 | 1 | 46  | 5  | 0.109 | <a href="#">AGCTCCGCTTC</a>           |
| Bomo_Ch25 | 10356806 | 10356806 | 1 | 45  | 1  | 0.022 | <a href="#">TGCTCCGTATC</a>           |

|            |          |          |   |     |    |       |                                                           |
|------------|----------|----------|---|-----|----|-------|-----------------------------------------------------------|
| Bomo_Chr25 | 10356842 | 10356842 | 1 | 42  | 0  | 0     | TGCTCCGTAAC                                               |
| Bomo_Chr25 | 10356866 | 10356866 | 1 | 42  | 2  | 0.048 | <a href="#">TGCTCCGTATC</a>                               |
| Bomo_Chr25 | 10356920 | 10356920 | 1 | 32  | 2  | 0.062 | <a href="#">AGCTCCGCTTC</a>                               |
| Bomo_Chr25 | 10356948 | 10356977 | 5 | 370 | 10 | 0.027 | TCTGACGACCAAGCGTATTCGTAGCCGCT <a href="#">ATATCCGCCAT</a> |
| Bomo_Chr25 | 10357037 | 10357037 | 1 | 53  | 0  | 0     | <a href="#">AGCACCGGCAC</a>                               |
| Bomo_Chr25 | 10357061 | 10357061 | 1 | 46  | 2  | 0.043 | <a href="#">AGCTCCGCTTC</a>                               |
| Bomo_Chr25 | 10357079 | 10357079 | 1 | 43  | 0  | 0     | <a href="#">TGCTCCGTACC</a>                               |
| Bomo_Chr25 | 10357091 | 10357091 | 1 | 43  | 1  | 0.023 | <a href="#">TGCTCCGTATC</a>                               |
| Bomo_Chr25 | 10357199 | 10357199 | 1 | 42  | 2  | 0.048 | <a href="#">AGCACCGGCAC</a>                               |
| Bomo_Chr25 | 10357235 | 10357235 | 1 | 59  | 0  | 0     | <a href="#">AGCACCGGCAC</a>                               |
| Bomo_Chr25 | 10357253 | 10357253 | 1 | 45  | 5  | 0.111 | <a href="#">AGCTCCGCTTC</a>                               |
| Bomo_Chr25 | 10357271 | 10357280 | 2 | 130 | 2  | 0.015 | <a href="#">TGCTCCGTATC</a> CAGCGCCAG                     |
| Bomo_Chr25 | 10357295 | 10357304 | 2 | 144 | 0  | 0     | <a href="#">TGCTCCGTATC</a> CAACGCCAG                     |
| Bomo_Chr25 | 10357319 | 10357319 | 1 | 42  | 1  | 0.024 | <a href="#">TGCTCCGTATC</a>                               |
| Bomo_Chr25 | 10357343 | 10357343 | 1 | 40  | 0  | 0     | <a href="#">TGCTCCGTACC</a>                               |
| Bomo_Chr25 | 10357355 | 10357355 | 1 | 37  | 0  | 0     | <a href="#">TGCTCCGTATC</a>                               |
| Bomo_Chr25 | 10357487 | 10357487 | 1 | 39  | 2  | 0.051 | <a href="#">AGCACCGGCAC</a>                               |
| Bomo_Chr25 | 10357529 | 10357532 | 2 | 140 | 0  | 0     | AGCACCGCGCCAG                                             |
| Bomo_Chr25 | 10357547 | 10357547 | 1 | 37  | 3  | 0.081 | <a href="#">AGCTCCGCTTC</a>                               |
| Bomo_Chr25 | 10357565 | 10357565 | 1 | 45  | 0  | 0     | <a href="#">TGCTCCGTATC</a>                               |
| Bomo_Chr25 | 10357601 | 10357601 | 1 | 32  | 1  | 0.031 | <a href="#">TGCTCCGTATC</a>                               |
| Bomo_Chr25 | 10357625 | 10357625 | 1 | 44  | 0  | 0     | <a href="#">TGCTCCGTATC</a>                               |
| Bomo_Chr25 | 10357728 | 10357728 | 1 | 28  | 1  | 0.036 | GCACCCGAACC                                               |
| Bomo_Chr25 | 10357757 | 10357757 | 1 | 48  | 1  | 0.021 | <a href="#">AGCACCGGCAC</a>                               |
| Bomo_Chr25 | 10357793 | 10357793 | 1 | 46  | 3  | 0.065 | <a href="#">AGCACCGGCAC</a>                               |
| Bomo_Chr25 | 10357811 | 10357811 | 1 | 41  | 3  | 0.073 | <a href="#">AGCTCCGCTTC</a>                               |

|            |          |          |   |     |   |       |                                                            |
|------------|----------|----------|---|-----|---|-------|------------------------------------------------------------|
| Bomo_Chr25 | 10357829 | 10357829 | 1 | 44  | 0 | 0     | <a href="#">TGCTCCGTATC</a>                                |
| Bomo_Chr25 | 10357865 | 10357865 | 1 | 42  | 1 | 0.024 | <a href="#">TGCTCCGTATC</a>                                |
| Bomo_Chr25 | 10357889 | 10357889 | 1 | 38  | 1 | 0.026 | <a href="#">TGCTCCGTATC</a>                                |
| Bomo_Chr25 | 10357943 | 10357943 | 1 | 36  | 3 | 0.083 | <a href="#">AGCTCCGCTTC</a>                                |
| Bomo_Chr25 | 10357971 | 10358000 | 5 | 365 | 5 | 0.014 | TCTGACGACCAAGCGTATTTCGTAGCCGCT <a href="#">ATATCCGCCAT</a> |
| Bomo_Chr25 | 10358057 | 10358057 | 1 | 47  | 1 | 0.021 | <a href="#">AGCACCGGCAC</a>                                |
| Bomo_Chr25 | 10358081 | 10358081 | 1 | 39  | 0 | 0     | <a href="#">AGCTCCGCTTC</a>                                |
| Bomo_Chr25 | 10358099 | 10358099 | 1 | 53  | 2 | 0.038 | <a href="#">TGCTCCGTATC</a>                                |
| Bomo_Chr25 | 10358201 | 10358201 | 1 | 51  | 1 | 0.02  | <a href="#">AGCACCGGCAC</a>                                |
| Bomo_Chr25 | 10358219 | 10358219 | 1 | 40  | 2 | 0.05  | <a href="#">AGCTCCGCTTC</a>                                |
| Bomo_Chr25 | 10358237 | 10358237 | 1 | 38  | 1 | 0.026 | <a href="#">TGCTCCGTATC</a>                                |
| Bomo_Chr25 | 10358270 | 10358270 | 1 | 41  | 3 | 0.073 | <a href="#">TGCTCCGTATC</a>                                |
| Bomo_Chr25 | 10358294 | 10358294 | 1 | 40  | 0 | 0     | <a href="#">TGCTCCGTATC</a>                                |
| Bomo_Chr25 | 10358450 | 10358450 | 1 | 39  | 1 | 0.026 | <a href="#">AGCACCGGCAC</a>                                |
| Bomo_Chr25 | 10358480 | 10358480 | 1 | 39  | 0 | 0     | <a href="#">AGCACCGGCAC</a>                                |
| Bomo_Chr25 | 10358492 | 10358492 | 1 | 52  | 0 | 0     | <a href="#">AGCACCGGCAC</a>                                |
| Bomo_Chr25 | 10358510 | 10358510 | 1 | 43  | 3 | 0.07  | <a href="#">AGCTCCGCTTC</a>                                |
| Bomo_Chr25 | 10358528 | 10358537 | 2 | 126 | 2 | 0.016 | <a href="#">TGCTCCGTATC</a> CAGCGCCAG                      |
| Bomo_Chr25 | 10358552 | 10358561 | 2 | 150 | 0 | 0     | <a href="#">TGCTCCGTATC</a> CAACGCCAG                      |
| Bomo_Chr25 | 10358576 | 10358576 | 1 | 42  | 0 | 0     | <a href="#">TGCTCCGTATC</a>                                |
| Bomo_Chr25 | 10358600 | 10358600 | 1 | 46  | 3 | 0.065 | <a href="#">TGCTCCGTACC</a>                                |
| Bomo_Chr25 | 10358612 | 10358612 | 1 | 44  | 1 | 0.023 | <a href="#">TGCTCCGTATC</a>                                |
| Bomo_Chr25 | 10358732 | 10358732 | 1 | 52  | 2 | 0.038 | <a href="#">AGCACCGGCAC</a>                                |
| Bomo_Chr25 | 10358750 | 10358750 | 1 | 39  | 1 | 0.026 | <a href="#">AGCTCCGCTTC</a>                                |
| Bomo_Chr25 | 10358768 | 10358777 | 2 | 124 | 2 | 0.016 | <a href="#">TGCTCCGTATC</a> CAGCGCCAG                      |
| Bomo_Chr25 | 10358792 | 10358801 | 2 | 146 | 0 | 0     | <a href="#">TGCTCCGTATC</a> CAACGCCAG                      |

|           |          |          |   |     |   |       |                                                           |
|-----------|----------|----------|---|-----|---|-------|-----------------------------------------------------------|
| Bomo_Ch25 | 10358816 | 10358816 | 1 | 42  | 0 | 0     | <a href="#">TGCTCCGTATC</a>                               |
| Bomo_Ch25 | 10358840 | 10358840 | 1 | 39  | 0 | 0     | TATTCCTGACC                                               |
| Bomo_Ch25 | 10358852 | 10358852 | 1 | 44  | 0 | 0     | <a href="#">TGCTCCGTATC</a>                               |
| Bomo_Ch25 | 10358906 | 10358906 | 1 | 43  | 0 | 0     | <a href="#">AGCACCGGCAC</a>                               |
| Bomo_Ch25 | 10358930 | 10358930 | 1 | 44  | 1 | 0.023 | <a href="#">AGCACCGGCAC</a>                               |
| Bomo_Ch25 | 10358942 | 10358942 | 1 | 55  | 1 | 0.018 | <a href="#">AGCACCGGCAC</a>                               |
| Bomo_Ch25 | 10358960 | 10358960 | 1 | 41  | 1 | 0.024 | <a href="#">AGCTCCGCTTC</a>                               |
| Bomo_Ch25 | 10358978 | 10358987 | 2 | 130 | 2 | 0.015 | <a href="#">TGCTCCGTATC</a> CAGCGCCAG                     |
| Bomo_Ch25 | 10359002 | 10359011 | 2 | 146 | 0 | 0     | <a href="#">TGCTCCGTATC</a> CAACGCCAG                     |
| Bomo_Ch25 | 10359026 | 10359026 | 1 | 45  | 1 | 0.022 | <a href="#">TGCTCCGTATC</a>                               |
| Bomo_Ch25 | 10359050 | 10359050 | 1 | 38  | 0 | 0     | <a href="#">TGCTCCGTACC</a>                               |
| Bomo_Ch25 | 10359062 | 10359062 | 1 | 39  | 0 | 0     | <a href="#">TGCTCCGTATC</a>                               |
| Bomo_Ch25 | 10359116 | 10359116 | 1 | 42  | 3 | 0.071 | <a href="#">AGCTCCGCTTC</a>                               |
| Bomo_Ch25 | 10359144 | 10359173 | 5 | 345 | 0 | 0     | TCTGACGACCAAGCGTATTCGTAGCCGCT <a href="#">ATATCCGCCAT</a> |
| Bomo_Ch25 | 10359233 | 10359233 | 1 | 47  | 0 | 0     | <a href="#">AGCACCGGCAC</a>                               |
| Bomo_Ch25 | 10359257 | 10359257 | 1 | 42  | 4 | 0.095 | <a href="#">AGCTCCGCTTC</a>                               |
| Bomo_Ch25 | 10359275 | 10359275 | 1 | 42  | 2 | 0.048 | <a href="#">TGCTCCGTATC</a>                               |
| Bomo_Ch25 | 10359311 | 10359311 | 1 | 43  | 0 | 0     | <a href="#">TACTCCGTATC</a>                               |
| Bomo_Ch25 | 10359335 | 10359335 | 1 | 44  | 1 | 0.023 | <a href="#">TGCTCCGTATC</a>                               |
| Bomo_Ch25 | 10359413 | 10359413 | 1 | 40  | 3 | 0.075 | <a href="#">TGAACCGGCAC</a>                               |
| Bomo_Ch25 | 10359449 | 10359449 | 1 | 42  | 2 | 0.048 | <a href="#">AGCACCGGCAC</a>                               |
| Bomo_Ch25 | 10359503 | 10359503 | 1 | 50  | 0 | 0     | <a href="#">AGCACCGGCAC</a>                               |
| Bomo_Ch25 | 10359557 | 10359557 | 1 | 44  | 4 | 0.091 | <a href="#">AGCTCCGCTTC</a>                               |
| Bomo_Ch25 | 10359575 | 10359575 | 1 | 40  | 1 | 0.025 | <a href="#">TGCTCCGTATC</a>                               |
| Bomo_Ch25 | 10359611 | 10359611 | 1 | 44  | 1 | 0.023 | <a href="#">TACTCCGTATC</a>                               |
| Bomo_Ch25 | 10359635 | 10359635 | 1 | 41  | 0 | 0     | <a href="#">TGCTCCGTATC</a>                               |

|            |          |          |   |     |    |       |                                          |
|------------|----------|----------|---|-----|----|-------|------------------------------------------|
| Bomo_Chr25 | 10359713 | 10359713 | 1 | 40  | 0  | 0     | TGAACCGGCAC                              |
| Bomo_Chr25 | 10359749 | 10359749 | 1 | 34  | 2  | 0.059 | AGCACCGGCAC                              |
| Bomo_Chr25 | 10359785 | 10359785 | 1 | 43  | 1  | 0.023 | AGCTCCGCTTC                              |
| Bomo_Chr25 | 10359803 | 10359803 | 1 | 46  | 3  | 0.065 | TGCTCCGTATC                              |
| Bomo_Chr25 | 10359839 | 10359839 | 1 | 43  | 1  | 0.023 | TACTCCGTATC                              |
| Bomo_Chr25 | 10359947 | 10359947 | 1 | 39  | 0  | 0     | TGAACCGGCAC                              |
| Bomo_Chr25 | 10359983 | 10359983 | 1 | 37  | 0  | 0     | AGCACCGGCAC                              |
| Bomo_Chr25 | 10360037 | 10360037 | 1 | 40  | 2  | 0.05  | AGCTCCGCTTC                              |
| Bomo_Chr25 | 10360055 | 10360055 | 1 | 47  | 4  | 0.085 | TGCTCCGTATC                              |
| Bomo_Chr25 | 10360091 | 10360091 | 1 | 45  | 4  | 0.089 | TACTCCGTATC                              |
| Bomo_Chr25 | 10360115 | 10360115 | 1 | 41  | 1  | 0.024 | TGCTCCGTATC                              |
| Bomo_Chr25 | 10360199 | 10360199 | 1 | 40  | 1  | 0.025 | AGCACCGGCAC                              |
| Bomo_Chr25 | 10360253 | 10360253 | 1 | 31  | 5  | 0.161 | AGTTCGGCTTC                              |
| Bomo_Chr25 | 10360271 | 10360271 | 1 | 44  | 2  | 0.045 | TGCTCCGTATC                              |
| Bomo_Chr25 | 10360307 | 10360307 | 1 | 42  | 1  | 0.024 | TACTCCGTATC                              |
| Bomo_Chr25 | 10360343 | 10360343 | 1 | 43  | 1  | 0.023 | TACTCCGTATC                              |
| Bomo_Chr25 | 10360427 | 10360427 | 1 | 50  | 1  | 0.02  | AGCACCGGCAC                              |
| Bomo_Chr25 | 10360481 | 10360481 | 1 | 34  | 7  | 0.206 | AGTTCGGCTTC                              |
| Bomo_Chr25 | 10360499 | 10360499 | 1 | 39  | 1  | 0.026 | TGCTCCGTATC                              |
| Bomo_Chr25 | 10360601 | 10360601 | 1 | 38  | 4  | 0.105 | AGCTCCGCTTC                              |
| Bomo_Chr25 | 10360619 | 10360619 | 1 | 48  | 1  | 0.021 | TGCTCCGTATC                              |
| Bomo_Chr25 | 10360643 | 10360643 | 1 | 48  | 1  | 0.021 | TGCTCCGTATC                              |
| Bomo_Chr25 | 10360733 | 10360733 | 1 | 36  | 5  | 0.139 | AGCTCCGCTTC                              |
| Bomo_Chr25 | 10360761 | 10360790 | 5 | 350 | 10 | 0.029 | TCTGACGACCAAGCGTATTCGTAGCCGCTATATCCGCCAT |
| Bomo_Chr25 | 10360850 | 10360850 | 1 | 49  | 1  | 0.02  | AGCACCGGCAC                              |
| Bomo_Chr25 | 10360874 | 10360874 | 1 | 38  | 2  | 0.053 | AGCTCCGCTTC                              |

|           |          |          |   |     |   |       |                                       |
|-----------|----------|----------|---|-----|---|-------|---------------------------------------|
| Bomo_Ch25 | 10360892 | 10360892 | 1 | 47  | 0 | 0     | <a href="#">TGCTCCGTATC</a>           |
| Bomo_Ch25 | 10360940 | 10360940 | 1 | 44  | 0 | 0     | <a href="#">AGCACCGGCAC</a>           |
| Bomo_Ch25 | 10360964 | 10360964 | 1 | 53  | 0 | 0     | <a href="#">AGCACCGGCAC</a>           |
| Bomo_Ch25 | 10360982 | 10360982 | 1 | 43  | 1 | 0.023 | <a href="#">AGCTCCGCTTC</a>           |
| Bomo_Ch25 | 10361000 | 10361009 | 2 | 136 | 2 | 0.015 | <a href="#">TGCTCCGTATC</a> CAGCGCCAG |
| Bomo_Ch25 | 10361024 | 10361033 | 2 | 144 | 0 | 0     | <a href="#">TGCTCCGTATC</a> CAACGCCAG |
| Bomo_Ch25 | 10361048 | 10361048 | 1 | 47  | 1 | 0.021 | <a href="#">TGCTCCGTATC</a>           |
| Bomo_Ch25 | 10361072 | 10361072 | 1 | 42  | 1 | 0.024 | <a href="#">TGCTCCGTACC</a>           |
| Bomo_Ch25 | 10361084 | 10361084 | 1 | 38  | 0 | 0     | <a href="#">TGCTCCGTATC</a>           |
| Bomo_Ch25 | 10361186 | 10361186 | 1 | 45  | 0 | 0     | <a href="#">AGCACCGGCAC</a>           |
| Bomo_Ch25 | 10361228 | 10361228 | 1 | 52  | 0 | 0     | <a href="#">AGCACCGGCAC</a>           |
| Bomo_Ch25 | 10361246 | 10361246 | 1 | 43  | 3 | 0.07  | <a href="#">AGCTCCGCTTC</a>           |
| Bomo_Ch25 | 10361264 | 10361264 | 1 | 46  | 1 | 0.022 | <a href="#">TGCTCCGTATC</a>           |
| Bomo_Ch25 | 10361300 | 10361300 | 1 | 46  | 0 | 0     | <a href="#">TACTCCGTATC</a>           |
| Bomo_Ch25 | 10361324 | 10361324 | 1 | 43  | 1 | 0.023 | <a href="#">TGCTCCGTATC</a>           |
| Bomo_Ch25 | 10361402 | 10361402 | 1 | 43  | 0 | 0     | <a href="#">TGAACCGGCAC</a>           |
| Bomo_Ch25 | 10361438 | 10361438 | 1 | 47  | 2 | 0.043 | <a href="#">AGCACCGGCAC</a>           |
| Bomo_Ch25 | 10361486 | 10361486 | 1 | 48  | 0 | 0     | <a href="#">TGAACCGGCAC</a>           |
| Bomo_Ch25 | 10361522 | 10361522 | 1 | 45  | 0 | 0     | <a href="#">AGCACCGGCAC</a>           |
| Bomo_Ch25 | 10361576 | 10361576 | 1 | 44  | 3 | 0.068 | <a href="#">AGCACCGGCAC</a>           |
| Bomo_Ch25 | 10361630 | 10361630 | 1 | 43  | 2 | 0.047 | <a href="#">AGCTCCGCTTC</a>           |
| Bomo_Ch25 | 10361648 | 10361648 | 1 | 46  | 0 | 0     | <a href="#">TGCTCCGTATC</a>           |
| Bomo_Ch25 | 10361684 | 10361684 | 1 | 49  | 0 | 0     | <a href="#">TACTCCGTATC</a>           |
| Bomo_Ch25 | 10361708 | 10361708 | 1 | 47  | 3 | 0.064 | <a href="#">TGCTCCGTATC</a>           |
| Bomo_Ch25 | 10361786 | 10361786 | 1 | 41  | 1 | 0.024 | <a href="#">TGAACCGGCAC</a>           |
| Bomo_Ch25 | 10361822 | 10361822 | 1 | 39  | 4 | 0.103 | <a href="#">AGCACCGGCAC</a>           |



|            |          |          |   |     |   |       |                                                            |
|------------|----------|----------|---|-----|---|-------|------------------------------------------------------------|
| Bomo_Chr25 | 10361858 | 10361858 | 1 | 48  | 5 | 0.104 | <a href="#">AGCTCCGCTTC</a>                                |
| Bomo_Chr25 | 10361876 | 10361876 | 1 | 42  | 0 | 0     | <a href="#">TGCTCCGTATC</a>                                |
| Bomo_Chr25 | 10361912 | 10361912 | 1 | 41  | 1 | 0.024 | <a href="#">TACTCCGTATC</a>                                |
| Bomo_Chr25 | 10362020 | 10362020 | 1 | 42  | 1 | 0.024 | <a href="#">TGAACCGGCAC</a>                                |
| Bomo_Chr25 | 10362056 | 10362056 | 1 | 49  | 2 | 0.041 | <a href="#">AGCACCGGCAC</a>                                |
| Bomo_Chr25 | 10362110 | 10362110 | 1 | 43  | 2 | 0.047 | <a href="#">AGCTCCGCTTC</a>                                |
| Bomo_Chr25 | 10362128 | 10362128 | 1 | 51  | 2 | 0.039 | <a href="#">TGCTCCGTATC</a>                                |
| Bomo_Chr25 | 10362164 | 10362164 | 1 | 51  | 0 | 0     | <a href="#">TACTCCGTATC</a>                                |
| Bomo_Chr25 | 10362188 | 10362188 | 1 | 45  | 1 | 0.022 | <a href="#">TGCTCCGTATC</a>                                |
| Bomo_Chr25 | 10362272 | 10362272 | 1 | 43  | 1 | 0.023 | <a href="#">AGCACCGGCAC</a>                                |
| Bomo_Chr25 | 10362308 | 10362308 | 1 | 60  | 2 | 0.033 | <a href="#">AGCACCGGCAC</a>                                |
| Bomo_Chr25 | 10362326 | 10362326 | 1 | 41  | 0 | 0     | <a href="#">AGCTCCGCTTC</a>                                |
| Bomo_Chr25 | 10362344 | 10362344 | 1 | 51  | 0 | 0     | <a href="#">TGCTCCGTATC</a>                                |
| Bomo_Chr25 | 10362392 | 10362392 | 1 | 45  | 2 | 0.044 | <a href="#">AGCACCGGCAC</a>                                |
| Bomo_Chr25 | 10362428 | 10362428 | 1 | 52  | 1 | 0.019 | <a href="#">AGCACCGGCAC</a>                                |
| Bomo_Chr25 | 10362482 | 10362482 | 1 | 46  | 1 | 0.022 | <a href="#">AGCTCCGCTTC</a>                                |
| Bomo_Chr25 | 10362500 | 10362500 | 1 | 56  | 2 | 0.036 | <a href="#">TGCTCCGTATC</a>                                |
| Bomo_Chr25 | 10362536 | 10362536 | 1 | 51  | 2 | 0.039 | <a href="#">TGCTCCGTATC</a>                                |
| Bomo_Chr25 | 10362650 | 10362650 | 1 | 38  | 5 | 0.132 | <a href="#">AGCTCCGCTTC</a>                                |
| Bomo_Chr25 | 10362678 | 10362707 | 5 | 395 | 0 | 0     | TCTGACGACCAAGCGTATTTCGTAGCCGCT <a href="#">ATATCCGCCAT</a> |
| Bomo_Chr25 | 10362767 | 10362767 | 1 | 50  | 0 | 0     | <a href="#">AGCACCGGCAC</a>                                |
| Bomo_Chr25 | 10362791 | 10362791 | 1 | 48  | 0 | 0     | <a href="#">AGCTCCGCTTC</a>                                |
| Bomo_Chr25 | 10362809 | 10362809 | 1 | 58  | 1 | 0.017 | <a href="#">TGCTCCGTATC</a>                                |
| Bomo_Chr25 | 10362839 | 10362839 | 1 | 44  | 1 | 0.023 | <a href="#">AGCACCGGCAC</a>                                |
| Bomo_Chr25 | 10362923 | 10362923 | 1 | 52  | 1 | 0.019 | <a href="#">AGCACCGGCAC</a>                                |
| Bomo_Chr25 | 10362965 | 10362965 | 1 | 64  | 0 | 0     | <a href="#">AGCACCGGCAC</a>                                |

|           |          |          |   |     |   |       |                                                           |
|-----------|----------|----------|---|-----|---|-------|-----------------------------------------------------------|
| Bomo_Ch25 | 10362983 | 10362983 | 1 | 39  | 2 | 0.051 | <a href="#">AGCTCCGCTTC</a>                               |
| Bomo_Ch25 | 10363001 | 10363001 | 1 | 51  | 0 | 0     | AGCTCCGTATC                                               |
| Bomo_Ch25 | 10363037 | 10363037 | 1 | 53  | 1 | 0.019 | <a href="#">TGCTCCGTATC</a>                               |
| Bomo_Ch25 | 10363061 | 10363061 | 1 | 56  | 0 | 0     | <a href="#">TGCTCCGTATC</a>                               |
| Bomo_Ch25 | 10363127 | 10363127 | 1 | 48  | 2 | 0.042 | <a href="#">AGCACCGGCAC</a>                               |
| Bomo_Ch25 | 10363163 | 10363163 | 1 | 58  | 0 | 0     | <a href="#">AGCACCGGCAC</a>                               |
| Bomo_Ch25 | 10363181 | 10363181 | 1 | 50  | 1 | 0.02  | <a href="#">AGCTCCGCTTC</a>                               |
| Bomo_Ch25 | 10363199 | 10363199 | 1 | 53  | 0 | 0     | <a href="#">TGCTCCGTATC</a>                               |
| Bomo_Ch25 | 10363223 | 10363223 | 1 | 45  | 0 | 0     | <a href="#">TGCTCCGTACC</a>                               |
| Bomo_Ch25 | 10363235 | 10363235 | 1 | 54  | 0 | 0     | <a href="#">TGCTCCGTATC</a>                               |
| Bomo_Ch25 | 10363319 | 10363319 | 1 | 52  | 0 | 0     | <a href="#">AGCACCGGCAC</a>                               |
| Bomo_Ch25 | 10363349 | 10363349 | 1 | 70  | 0 | 0     | <a href="#">AGCACCGGCAC</a>                               |
| Bomo_Ch25 | 10363367 | 10363367 | 1 | 50  | 4 | 0.08  | <a href="#">AGCTCCGCTTC</a>                               |
| Bomo_Ch25 | 10363385 | 10363385 | 1 | 62  | 0 | 0     | <a href="#">TGCTCCGTATC</a>                               |
| Bomo_Ch25 | 10363409 | 10363409 | 1 | 61  | 1 | 0.016 | <a href="#">TGCTCCGTATC</a>                               |
| Bomo_Ch25 | 10363457 | 10363457 | 1 | 42  | 3 | 0.071 | <a href="#">AGTCCGCTTC</a>                                |
| Bomo_Ch25 | 10363475 | 10363475 | 1 | 61  | 1 | 0.016 | <a href="#">TGCTCCGTATC</a>                               |
| Bomo_Ch25 | 10363511 | 10363511 | 1 | 55  | 1 | 0.018 | <a href="#">TGCTCCGTATC</a>                               |
| Bomo_Ch25 | 10363535 | 10363535 | 1 | 60  | 0 | 0     | <a href="#">TGCTCCGTATC</a>                               |
| Bomo_Ch25 | 10363574 | 10363574 | 1 | 59  | 0 | 0     | ACCTGCGCCAG                                               |
| Bomo_Ch25 | 10363607 | 10363607 | 1 | 51  | 3 | 0.059 | <a href="#">AGCTCCGCTTC</a>                               |
| Bomo_Ch25 | 10363635 | 10363664 | 5 | 435 | 5 | 0.011 | TCTGACGACCAAGCGTATTCGTAGCCGCT <a href="#">ATATCCGCCAT</a> |
| Bomo_Ch25 | 10363724 | 10363724 | 1 | 61  | 0 | 0     | <a href="#">AGCACCGGCAC</a>                               |
| Bomo_Ch25 | 10363748 | 10363748 | 1 | 50  | 4 | 0.08  | <a href="#">AGCTCCGCTTC</a>                               |
| Bomo_Ch25 | 10363766 | 10363766 | 1 | 66  | 2 | 0.03  | <a href="#">TGCTCCGTATC</a>                               |
| Bomo_Ch25 | 10363862 | 10363862 | 1 | 52  | 1 | 0.019 | AGCACCGCTTC                                               |

|           |          |          |   |    |   |       |                             |
|-----------|----------|----------|---|----|---|-------|-----------------------------|
| Bomo_Ch25 | 10363880 | 10363880 | 1 | 61 | 2 | 0.033 | <a href="#">TGCTCCGTATC</a> |
| Bomo_Ch25 | 10363916 | 10363916 | 1 | 61 | 1 | 0.016 | <a href="#">TGCTCCGTATC</a> |
| Bomo_Ch25 | 10363940 | 10363940 | 1 | 59 | 0 | 0     | <a href="#">TGCTCCGTATC</a> |
| Bomo_Ch25 | 10364006 | 10364006 | 1 | 50 | 2 | 0.04  | <a href="#">AGCACCGGCAC</a> |
| Bomo_Ch25 | 10364060 | 10364060 | 1 | 60 | 2 | 0.033 | AGAACCGGCAC                 |
| Bomo_Ch25 | 10364096 | 10364096 | 1 | 53 | 0 | 0     | <a href="#">AGCACCGGCAC</a> |
| Bomo_Ch25 | 10364186 | 10364186 | 1 | 54 | 5 | 0.093 | <a href="#">AGCTCCGCTTC</a> |
| Bomo_Ch25 | 10364204 | 10364204 | 1 | 52 | 1 | 0.019 | <a href="#">TGCTCCGTATC</a> |
| Bomo_Ch25 | 10364240 | 10364240 | 1 | 54 | 0 | 0     | <a href="#">TGCTCCGTATC</a> |
| Bomo_Ch25 | 10364294 | 10364294 | 1 | 55 | 1 | 0.018 | <a href="#">AGCACCGGCAC</a> |
| Bomo_Ch25 | 10364312 | 10364312 | 1 | 49 | 0 | 0     | <a href="#">AGCTCCGCTTC</a> |
| Bomo_Ch25 | 10364330 | 10364330 | 1 | 57 | 0 | 0     | <a href="#">TGCTCCGTATC</a> |
| Bomo_Ch25 | 10364366 | 10364366 | 1 | 61 | 0 | 0     | <a href="#">TGCTCCGTATC</a> |
| Bomo_Ch25 | 10364390 | 10364390 | 1 | 59 | 1 | 0.017 | <a href="#">TGCTCCGTATC</a> |
| Bomo_Ch25 | 10364456 | 10364456 | 1 | 57 | 1 | 0.018 | AGAACCGGCAC                 |
| Bomo_Ch25 | 10364492 | 10364492 | 1 | 49 | 1 | 0.02  | <a href="#">AGCACCGGCAC</a> |
| Bomo_Ch25 | 10364564 | 10364564 | 1 | 51 | 0 | 0     | <a href="#">AGCTCCGCTTC</a> |
| Bomo_Ch25 | 10364582 | 10364582 | 1 | 62 | 0 | 0     | <a href="#">TGCTCCGTATC</a> |
| Bomo_Ch25 | 10364636 | 10364636 | 1 | 57 | 1 | 0.018 | <a href="#">AGCACCGGCAC</a> |
| Bomo_Ch25 | 10364762 | 10364762 | 1 | 52 | 0 | 0     | <a href="#">AGCACCGGCAC</a> |
| Bomo_Ch25 | 10364798 | 10364798 | 1 | 58 | 1 | 0.017 | <a href="#">AGCACCGGCAC</a> |
| Bomo_Ch25 | 10364816 | 10364816 | 1 | 55 | 2 | 0.036 | <a href="#">AGCTCCGCTTC</a> |
| Bomo_Ch25 | 10364834 | 10364834 | 1 | 54 | 1 | 0.019 | AGCTCCGTATC                 |
| Bomo_Ch25 | 10364870 | 10364870 | 1 | 60 | 0 | 0     | <a href="#">TGCTCCGTATC</a> |
| Bomo_Ch25 | 10364894 | 10364894 | 1 | 61 | 0 | 0     | <a href="#">TGCTCCGTATC</a> |
| Bomo_Ch25 | 10365020 | 10365020 | 1 | 46 | 2 | 0.043 | <a href="#">AGCTCCGCTTC</a> |

|            |          |          |   |     |    |       |                                          |
|------------|----------|----------|---|-----|----|-------|------------------------------------------|
| Bomo_Chr25 | 10365048 | 10365077 | 5 | 445 | 10 | 0.022 | TCTGACGACCAAGCGTATTCGTAGCCGCTATATCCGCCAT |
| Bomo_Chr25 | 10365137 | 10365137 | 1 | 69  | 1  | 0.014 | AGCACCGGCAC                              |
| Bomo_Chr25 | 10365161 | 10365161 | 1 | 57  | 3  | 0.053 | AGCTCCGCTTC                              |
| Bomo_Chr25 | 10365179 | 10365179 | 1 | 68  | 1  | 0.015 | TGCTCCGTATC                              |
| Bomo_Chr25 | 10365215 | 10365215 | 1 | 63  | 1  | 0.016 | TACTCCGTATC                              |
| Bomo_Chr25 | 10365239 | 10365239 | 1 | 66  | 0  | 0     | TGCTCCGTATC                              |
| Bomo_Chr25 | 10365305 | 10365305 | 1 | 49  | 2  | 0.041 | AGAACCGGCAC                              |
| Bomo_Chr25 | 10365359 | 10365359 | 1 | 49  | 2  | 0.041 | AGCACCGGCAC                              |
| Bomo_Chr25 | 10365395 | 10365395 | 1 | 63  | 0  | 0     | AGCACCGGCAC                              |
| Bomo_Chr25 | 10365449 | 10365449 | 1 | 55  | 2  | 0.036 | AGCTCCGCTTC                              |
| Bomo_Chr25 | 10365467 | 10365467 | 1 | 63  | 0  | 0     | TGCTCCGTATC                              |
| Bomo_Chr25 | 10365503 | 10365503 | 1 | 62  | 1  | 0.016 | TGCTCCGTATC                              |
| Bomo_Chr25 | 10365593 | 10365593 | 1 | 51  | 3  | 0.059 | AGCTCCGCTTC                              |
| Bomo_Chr25 | 10365621 | 10365650 | 5 | 455 | 5  | 0.011 | TCTGACGACCAAGCGTATTCGTAGCCGCTATATCCGCCAT |
| Bomo_Chr25 | 10365710 | 10365710 | 1 | 67  | 2  | 0.03  | AGCACCGGCAC                              |
| Bomo_Chr25 | 10365734 | 10365734 | 1 | 52  | 1  | 0.019 | AGCTCCGCTTC                              |
| Bomo_Chr25 | 10365752 | 10365752 | 1 | 71  | 1  | 0.014 | TGCTCCGTATC                              |
| Bomo_Chr25 | 10365788 | 10365788 | 1 | 60  | 1  | 0.017 | TGCTCCGTATC                              |
| Bomo_Chr25 | 10365812 | 10365812 | 1 | 68  | 0  | 0     | TGCTCCGTATC                              |
| Bomo_Chr25 | 10365896 | 10365896 | 1 | 55  | 1  | 0.018 | AGCACCGGCAC                              |
| Bomo_Chr25 | 10365968 | 10365968 | 1 | 58  | 1  | 0.017 | AGCTCCGCTTC                              |
| Bomo_Chr25 | 10365986 | 10365986 | 1 | 68  | 0  | 0     | TGCTCCGTATC                              |
| Bomo_Chr25 | 10366022 | 10366022 | 1 | 67  | 0  | 0     | TGCTCCGTATC                              |
| Bomo_Chr25 | 10366052 | 10366052 | 1 | 53  | 1  | 0.019 | AGCACCGGCAC                              |
| Bomo_Chr25 | 10366106 | 10366106 | 1 | 61  | 1  | 0.016 | AACACCGGCAC                              |
| Bomo_Chr25 | 10366178 | 10366178 | 1 | 60  | 1  | 0.017 | AGCTCCGCTTC                              |

|           |          |          |   |     |   |       |                                                           |
|-----------|----------|----------|---|-----|---|-------|-----------------------------------------------------------|
| Bomo_Ch25 | 10366196 | 10366196 | 1 | 65  | 0 | 0     | <a href="#">TGCTCCGTATC</a>                               |
| Bomo_Ch25 | 10366232 | 10366232 | 1 | 61  | 0 | 0     | <a href="#">TGCTCCGTATC</a>                               |
| Bomo_Ch25 | 10366256 | 10366256 | 1 | 65  | 0 | 0     | <a href="#">TGCTCCGTATC</a>                               |
| Bomo_Ch25 | 10366340 | 10366340 | 1 | 60  | 0 | 0     | <a href="#">AGCACCGGCAC</a>                               |
| Bomo_Ch25 | 10366412 | 10366412 | 1 | 61  | 3 | 0.049 | <a href="#">AGCTCCGCTTC</a>                               |
| Bomo_Ch25 | 10366430 | 10366430 | 1 | 66  | 1 | 0.015 | <a href="#">TGCTCCGTATC</a>                               |
| Bomo_Ch25 | 10366466 | 10366466 | 1 | 70  | 0 | 0     | <a href="#">TGCTCCGTATC</a>                               |
| Bomo_Ch25 | 10366496 | 10366496 | 1 | 64  | 1 | 0.016 | <a href="#">AGCACCGGCAC</a>                               |
| Bomo_Ch25 | 10366586 | 10366586 | 1 | 57  | 0 | 0     | <a href="#">AGCACCGGCAC</a>                               |
| Bomo_Ch25 | 10366640 | 10366640 | 1 | 62  | 4 | 0.065 | <a href="#">AGCTCCGCTTC</a>                               |
| Bomo_Ch25 | 10366658 | 10366658 | 1 | 69  | 2 | 0.029 | <a href="#">TGCTCCGTATC</a>                               |
| Bomo_Ch25 | 10366694 | 10366694 | 1 | 64  | 0 | 0     | <a href="#">TGCTCCGTATC</a>                               |
| Bomo_Ch25 | 10366718 | 10366718 | 1 | 70  | 0 | 0     | <a href="#">TGCTCCGTATC</a>                               |
| Bomo_Ch25 | 10366802 | 10366802 | 1 | 55  | 2 | 0.036 | <a href="#">AGCTCCGCTTC</a>                               |
| Bomo_Ch25 | 10366830 | 10366859 | 5 | 485 | 0 | 0     | TCTGACGACCAAGCGTATTCGTAGCCGCT <a href="#">ATATCCGCCAT</a> |
| Bomo_Ch25 | 10366919 | 10366919 | 1 | 62  | 1 | 0.016 | <a href="#">AGCACCGGCAC</a>                               |
| Bomo_Ch25 | 10366943 | 10366943 | 1 | 69  | 1 | 0.014 | <a href="#">AGCTCCGCTTC</a>                               |
| Bomo_Ch25 | 10366961 | 10366961 | 1 | 69  | 1 | 0.014 | <a href="#">TGCTCCGTATC</a>                               |
| Bomo_Ch25 | 10366997 | 10366997 | 1 | 69  | 0 | 0     | <a href="#">TGCTCCGTATC</a>                               |
| Bomo_Ch25 | 10367099 | 10367099 | 1 | 69  | 0 | 0     | <a href="#">AGCACCGGCAC</a>                               |
| Bomo_Ch25 | 10367135 | 10367135 | 1 | 78  | 0 | 0     | <a href="#">AGCACCGGCAC</a>                               |
| Bomo_Ch25 | 10367153 | 10367153 | 1 | 60  | 3 | 0.05  | <a href="#">AGCTCCGCTTC</a>                               |
| Bomo_Ch25 | 10367171 | 10367171 | 1 | 71  | 0 | 0     | <a href="#">TGCTCCGTATC</a>                               |
| Bomo_Ch25 | 10367207 | 10367207 | 1 | 69  | 0 | 0     | <a href="#">TGCTCCGTATC</a>                               |
| Bomo_Ch25 | 10367231 | 10367231 | 1 | 68  | 1 | 0.015 | <a href="#">TGCTCCGTATC</a>                               |
| Bomo_Ch25 | 10367357 | 10367357 | 1 | 60  | 1 | 0.017 | <a href="#">AGCACCGGCAC</a>                               |

|           |          |          |   |    |   |       |                             |
|-----------|----------|----------|---|----|---|-------|-----------------------------|
| Bomo_Ch25 | 10367375 | 10367375 | 1 | 58 | 0 | 0     | <a href="#">AGCACCGGCAC</a> |
| Bomo_Ch25 | 10367405 | 10367405 | 1 | 56 | 1 | 0.018 | <a href="#">AGCTCCGCTTC</a> |
| Bomo_Ch25 | 10367423 | 10367423 | 1 | 66 | 0 | 0     | <a href="#">TGCTCCGTATC</a> |
| Bomo_Ch25 | 10367459 | 10367459 | 1 | 68 | 2 | 0.029 | <a href="#">TGCTCCGTATC</a> |
| Bomo_Ch25 | 10367483 | 10367483 | 1 | 68 | 1 | 0.015 | <a href="#">TGCTCCGTATC</a> |
| Bomo_Ch25 | 10367657 | 10367657 | 1 | 55 | 1 | 0.018 | <a href="#">AGCACCGGCAC</a> |
| Bomo_Ch25 | 10367693 | 10367693 | 1 | 65 | 0 | 0     | <a href="#">AGCACCGGCAC</a> |
| Bomo_Ch25 | 10367711 | 10367711 | 1 | 62 | 0 | 0     | <a href="#">AGCTCCGCTTC</a> |
| Bomo_Ch25 | 10367729 | 10367729 | 1 | 74 | 0 | 0     | <a href="#">TGCTCCGTATC</a> |
| Bomo_Ch25 | 10367765 | 10367765 | 1 | 72 | 0 | 0     | <a href="#">TGCTCCGTATC</a> |
| Bomo_Ch25 | 10367789 | 10367789 | 1 | 74 | 3 | 0.041 | <a href="#">TGCTCCGTATC</a> |
| Bomo_Ch25 | 10367927 | 10367927 | 1 | 56 | 2 | 0.036 | <a href="#">AGCACCGGCAC</a> |
| Bomo_Ch25 | 10367963 | 10367963 | 1 | 55 | 0 | 0     | <a href="#">AGCTCCGCTTC</a> |
| Bomo_Ch25 | 10367981 | 10367981 | 1 | 64 | 2 | 0.031 | <a href="#">TGCTCCGTATC</a> |
| Bomo_Ch25 | 10368017 | 10368017 | 1 | 68 | 0 | 0     | <a href="#">TGCTCCGTATC</a> |
| Bomo_Ch25 | 10368041 | 10368041 | 1 | 67 | 1 | 0.015 | <a href="#">TGCTCCGTATC</a> |
| Bomo_Ch25 | 10368065 | 10368065 | 1 | 70 | 0 | 0     | <a href="#">TGCTCCGTATC</a> |
| Bomo_Ch25 | 10368167 | 10368167 | 1 | 53 | 1 | 0.019 | <a href="#">AGCACCGGCAC</a> |
| Bomo_Ch25 | 10368203 | 10368203 | 1 | 56 | 0 | 0     | <a href="#">AGCACCGGCAC</a> |
| Bomo_Ch25 | 10368239 | 10368239 | 1 | 64 | 1 | 0.016 | <a href="#">AGCACCGGCAC</a> |
| Bomo_Ch25 | 10368275 | 10368275 | 1 | 60 | 2 | 0.033 | <a href="#">AGCACCGGCAC</a> |
| Bomo_Ch25 | 10368311 | 10368311 | 1 | 75 | 0 | 0     | <a href="#">AGCACCGGCAC</a> |
| Bomo_Ch25 | 10368329 | 10368329 | 1 | 53 | 2 | 0.038 | <a href="#">AGCTCCGCTTC</a> |
| Bomo_Ch25 | 10368347 | 10368347 | 1 | 76 | 0 | 0     | <a href="#">TGCTCCGTATC</a> |
| Bomo_Ch25 | 10368383 | 10368383 | 1 | 71 | 0 | 0     | <a href="#">TGCTCCGTATC</a> |
| Bomo_Ch25 | 10368407 | 10368407 | 1 | 75 | 0 | 0     | <a href="#">TGCTCCGTATC</a> |

|           |          |          |   |     |   |       |                                       |
|-----------|----------|----------|---|-----|---|-------|---------------------------------------|
| Bomo_Ch25 | 10368470 | 10368470 | 1 | 64  | 4 | 0.062 | GCCAGCGCCAG                           |
| Bomo_Ch25 | 10368515 | 10368515 | 1 | 55  | 2 | 0.036 | <a href="#">AGCTCCGCTTC</a>           |
| Bomo_Ch25 | 10368537 | 10368551 | 3 | 294 | 0 | 0     | TCAGACGACCAAGCGTATTCGTAGC             |
| Bomo_Ch25 | 10368575 | 10368575 | 1 | 37  | 4 | 0.108 | <a href="#">ATATCCGCCAT</a>           |
| Bomo_Ch25 | 10368635 | 10368635 | 1 | 61  | 0 | 0     | <a href="#">AGCACCGGCAC</a>           |
| Bomo_Ch25 | 10368659 | 10368659 | 1 | 66  | 1 | 0.015 | <a href="#">AGCTCCGCTTC</a>           |
| Bomo_Ch25 | 10368677 | 10368677 | 1 | 71  | 2 | 0.028 | <a href="#">TGCTCCGTATC</a>           |
| Bomo_Ch25 | 10368713 | 10368713 | 1 | 67  | 0 | 0     | <a href="#">TGCTCCGTATC</a>           |
| Bomo_Ch25 | 10368737 | 10368737 | 1 | 71  | 1 | 0.014 | <a href="#">TGCTCCGTATC</a>           |
| Bomo_Ch25 | 10368821 | 10368821 | 1 | 58  | 1 | 0.017 | <a href="#">AGCACCGGCAC</a>           |
| Bomo_Ch25 | 10368893 | 10368893 | 1 | 42  | 0 | 0     | AGCACCGGCTC                           |
| Bomo_Ch25 | 10368929 | 10368929 | 1 | 59  | 1 | 0.017 | <a href="#">AGCTCCGCTTC</a>           |
| Bomo_Ch25 | 10368947 | 10368956 | 2 | 202 | 2 | 0.01  | <a href="#">TGCTCCGTATC</a> CAACGCCAG |
| Bomo_Ch25 | 10368971 | 10368971 | 1 | 78  | 0 | 0     | <a href="#">TGCTCCGTATC</a>           |
| Bomo_Ch25 | 10368995 | 10368995 | 1 | 80  | 1 | 0.013 | <a href="#">TGCTCCGTATC</a>           |
| Bomo_Ch25 | 10369019 | 10369019 | 1 | 77  | 1 | 0.013 | <a href="#">TGCTCCGTATC</a>           |
| Bomo_Ch25 | 10369121 | 10369121 | 1 | 59  | 1 | 0.017 | <a href="#">AGCACCGGCAC</a>           |
| Bomo_Ch25 | 10369157 | 10369157 | 1 | 71  | 0 | 0     | <a href="#">TGCTCCGTATC</a>           |
| Bomo_Ch25 | 10369181 | 10369181 | 1 | 73  | 2 | 0.027 | <a href="#">TGCTCCGTATC</a>           |
| Bomo_Ch25 | 10369295 | 10369301 | 2 | 178 | 0 | 0     | TGAACCGGCACCGGCAC                     |
| Bomo_Ch25 | 10369319 | 10369319 | 1 | 64  | 2 | 0.031 | <a href="#">AGCACCGGCAC</a>           |
| Bomo_Ch25 | 10369337 | 10369337 | 1 | 63  | 0 | 0     | <a href="#">AGCACCGGCAC</a>           |
| Bomo_Ch25 | 10369355 | 10369355 | 1 | 58  | 1 | 0.017 | <a href="#">AGCACCGGCAC</a>           |
| Bomo_Ch25 | 10369385 | 10369385 | 1 | 70  | 1 | 0.014 | <a href="#">AGCTCCGCTTC</a>           |
| Bomo_Ch25 | 10369403 | 10369403 | 1 | 74  | 1 | 0.014 | <a href="#">TGCTCCGTATC</a>           |
| Bomo_Ch25 | 10369415 | 10369415 | 1 | 74  | 1 | 0.014 | <a href="#">TGCTCCGTATC</a>           |

|           |          |          |   |     |   |       |                                       |
|-----------|----------|----------|---|-----|---|-------|---------------------------------------|
| Bomo_Ch25 | 10369451 | 10369451 | 1 | 78  | 1 | 0.013 | <a href="#">TGCTCCGTATC</a>           |
| Bomo_Ch25 | 10369475 | 10369475 | 1 | 75  | 0 | 0     | <a href="#">TGCTCCGTATC</a>           |
| Bomo_Ch25 | 10369499 | 10369499 | 1 | 58  | 2 | 0.034 | TGCTCCGGCTC                           |
| Bomo_Ch25 | 10369511 | 10369511 | 1 | 45  | 3 | 0.067 | TGCTCCGGCTC                           |
| Bomo_Ch25 | 10369523 | 10369532 | 2 | 196 | 2 | 0.01  | <a href="#">TGCTCCGTATC</a> CAGCGCCAG |
| Bomo_Ch25 | 10369559 | 10369559 | 1 | 53  | 0 | 0     | AGCACCGGCTC                           |
| Bomo_Ch25 | 10369577 | 10369577 | 1 | 63  | 0 | 0     | <a href="#">AGCACCGGCAC</a>           |
| Bomo_Ch25 | 10369607 | 10369607 | 1 | 77  | 0 | 0     | ACCTCCGTAAC                           |
| Bomo_Ch25 | 10369619 | 10369619 | 1 | 60  | 1 | 0.017 | AGTCCGGCAC                            |
| Bomo_Ch25 | 10369673 | 10369679 | 2 | 176 | 0 | 0     | AGTCCGGCACCCGGCAC                     |
| Bomo_Ch25 | 10369697 | 10369697 | 1 | 46  | 5 | 0.109 | AGTCCGTAAC                            |
| Bomo_Ch25 | 10369715 | 10369715 | 1 | 55  | 0 | 0     | AGCACCGGTAC                           |
| Bomo_Ch25 | 10369727 | 10369727 | 1 | 50  | 7 | 0.14  | <a href="#">AGCACCGGCAC</a>           |
| Bomo_Ch25 | 10369748 | 10369748 | 1 | 78  | 0 | 0     | ACCAGCGGCAG                           |
| Bomo_Ch25 | 10369793 | 10369793 | 1 | 59  | 3 | 0.051 | <a href="#">AGTCCGCTTC</a>            |
| Bomo_Ch25 | 10369811 | 10369820 | 2 | 186 | 0 | 0     | TTGTCCGTACCCAGCGCCAG                  |
| Bomo_Ch25 | 10369859 | 10369872 | 3 | 309 | 0 | 0     | AGCCCCGGCACCCGCACCCGCACC              |
| Bomo_Ch25 | 10369895 | 10369895 | 1 | 60  | 0 | 0     | AGTCCGGCAC                            |
| Bomo_Ch25 | 10369931 | 10369931 | 1 | 65  | 2 | 0.031 | AGTCCGGCAC                            |
| Bomo_Ch25 | 10369967 | 10369967 | 1 | 58  | 0 | 0     | AGTCCGGCAC                            |
| Bomo_Ch25 | 10370003 | 10370003 | 1 | 70  | 2 | 0.029 | AGTCCGGCAC                            |
| Bomo_Ch25 | 10370039 | 10370039 | 1 | 64  | 2 | 0.031 | AGTCCGGCAC                            |
| Bomo_Ch25 | 10370075 | 10370075 | 1 | 66  | 1 | 0.015 | AGTCCGGCAC                            |
| Bomo_Ch25 | 10370093 | 10370093 | 1 | 55  | 2 | 0.036 | <a href="#">AGCACCGGCAC</a>           |
| Bomo_Ch25 | 10370129 | 10370136 | 2 | 176 | 0 | 0     | AGTCCGGCACCCGCACC                     |
| Bomo_Ch25 | 10370150 | 10370150 | 1 | 77  | 2 | 0.026 | ACCAGCGGCAG                           |



|           |          |          |   |     |    |       |                             |
|-----------|----------|----------|---|-----|----|-------|-----------------------------|
| Bomo_Ch25 | 10370177 | 10370177 | 1 | 74  | 1  | 0.014 | TGCACCGACTG                 |
| Bomo_Ch25 | 10370201 | 10370205 | 2 | 208 | 2  | 0.01  | GAAATCGCTCGTATA             |
| Bomo_Ch25 | 10370243 | 10370252 | 2 | 210 | 0  | 0     | TGATACGTATGGCCCGCTCT        |
| Bomo_Ch25 | 10370271 | 10370271 | 1 | 76  | 0  | 0     | GCTCCCGCATC                 |
| Bomo_Ch25 | 10370309 | 10370309 | 1 | 30  | 4  | 0.133 | ACCATCGGAAA                 |
| Bomo_Ch25 | 10370351 | 10370367 | 4 | 408 | 0  | 0     | GGACTCGTTACCGTCGGAATCCGTGGT |
| Bomo_Ch25 | 10370378 | 10370382 | 2 | 204 | 0  | 0     | TATAACGAACGTCTT             |
| Bomo_Ch25 | 10370434 | 10370434 | 1 | 43  | 4  | 0.093 | TTTTCCGTTC                  |
| Bomo_Ch25 | 10370465 | 10370465 | 1 | 71  | 3  | 0.042 | TTCTTCGATAA                 |
| Bomo_Ch25 | 10370582 | 10370582 | 1 | 56  | 3  | 0.054 | ATAAGCGACAT                 |
| Bomo_Ch25 | 10370627 | 10370627 | 1 | 73  | 5  | 0.068 | CAATACGATAA                 |
| Bomo_Ch25 | 10370659 | 10370659 | 1 | 83  | 3  | 0.036 | AATTTTCGCACA                |
| Bomo_Ch25 | 10370671 | 10370680 | 2 | 184 | 2  | 0.011 | TCAATCGAAGTTAGCGCTGA        |
| Bomo_Ch25 | 10370693 | 10370693 | 1 | 74  | 1  | 0.014 | TGGAACGAGTT                 |
| Bomo_Ch25 | 10370753 | 10370753 | 1 | 81  | 3  | 0.037 | TGGGGCGTTAG                 |
| Bomo_Ch25 | 10370827 | 10370827 | 1 | 59  | 2  | 0.034 | CACCACGAGAT                 |
| Bomo_Ch25 | 10370872 | 10370872 | 1 | 75  | 0  | 0     | TGTTTCGAGCT                 |
| Bomo_Ch25 | 10370918 | 10370923 | 2 | 196 | 12 | 0.061 | AGCTACGCTCCGATGG            |
| Bomo_Ch25 | 10371009 | 10371023 | 4 | 416 | 4  | 0.01  | TATCACGTGATCGGTAACGCGACCC   |
| Bomo_Ch25 | 10371044 | 10371044 | 1 | 75  | 2  | 0.027 | TCTGGCGAGAA                 |
| Bomo_Ch25 | 10371065 | 10371065 | 1 | 83  | 1  | 0.012 | CAGCTCGTGTT                 |
| Bomo_Ch25 | 10371114 | 10371114 | 1 | 93  | 3  | 0.032 | TACCTCGAGGT                 |
| Bomo_Ch25 | 10371141 | 10371141 | 1 | 44  | 3  | 0.068 | ATTTGCGAAAA                 |
| Bomo_Ch25 | 10371193 | 10371193 | 1 | 71  | 1  | 0.014 | TAATGCGGTTA                 |
| Bomo_Ch25 | 10371219 | 10371219 | 1 | 72  | 4  | 0.056 | TCTTTCGTCTA                 |
| Bomo_Ch25 | 10371243 | 10371243 | 1 | 53  | 3  | 0.057 | CTTTACGAATT                 |

|           |          |          |   |     |    |       |                       |
|-----------|----------|----------|---|-----|----|-------|-----------------------|
| Bomo_Ch25 | 10371297 | 10371297 | 1 | 34  | 4  | 0.118 | TTTACCGGTGA           |
| Bomo_Ch25 | 10371361 | 10371361 | 1 | 32  | 2  | 0.062 | TTTGACGCAAA           |
| Bomo_Ch25 | 10371426 | 10371426 | 1 | 85  | 0  | 0     | TATTCCGTAGC           |
| Bomo_Ch25 | 10371437 | 10371441 | 2 | 176 | 2  | 0.011 | CCCCCGGGCGTGAC        |
| Bomo_Ch25 | 10371467 | 10371467 | 1 | 45  | 8  | 0.178 | ATTTACGATAT           |
| Bomo_Ch25 | 10371478 | 10371486 | 2 | 188 | 0  | 0     | CTGTGCGTTTTGGCGACCA   |
| Bomo_Ch25 | 10371509 | 10371517 | 2 | 196 | 0  | 0     | TGGCCCGTGATATCGTCTG   |
| Bomo_Ch25 | 10371568 | 10371568 | 1 | 102 | 3  | 0.029 | CAGAGCGCAGC           |
| Bomo_Ch25 | 10371617 | 10371617 | 1 | 87  | 2  | 0.023 | GGAACCGAACT           |
| Bomo_Ch25 | 10371667 | 10371677 | 2 | 196 | 4  | 0.02  | ATTTTCGAGTTTTGACGTATT |
| Bomo_Ch25 | 10371689 | 10371689 | 1 | 78  | 2  | 0.026 | ACTTTCGATAG           |
| Bomo_Ch25 | 10371771 | 10371771 | 1 | 84  | 2  | 0.024 | TACAACGTATG           |
| Bomo_Ch25 | 10371873 | 10371873 | 1 | 81  | 3  | 0.037 | AATATCGTTCA           |
| Bomo_Ch25 | 10371932 | 10371940 | 2 | 146 | 0  | 0     | AGGAACGGGACAGCGGAAA   |
| Bomo_Ch25 | 10371986 | 10371989 | 2 | 152 | 10 | 0.066 | CCAATCGGCGTGAT        |
| Bomo_Ch25 | 10372159 | 10372159 | 1 | 68  | 3  | 0.044 | TAGCACGACAT           |
| Bomo_Ch25 | 10372233 | 10372233 | 1 | 37  | 1  | 0.027 | TTTTACGGATT           |
| Bomo_Ch25 | 10372259 | 10372267 | 2 | 212 | 4  | 0.019 | TTTCCGAAATATCGAAAA    |
| Bomo_Ch25 | 10372305 | 10372305 | 1 | 83  | 1  | 0.012 | CATCTCGTAAT           |
| Bomo_Ch25 | 10372391 | 10372391 | 1 | 83  | 1  | 0.012 | TTTTACGAAAA           |
| Bomo_Ch25 | 10372424 | 10372424 | 1 | 84  | 1  | 0.012 | CAGAACGATTT           |
| Bomo_Ch25 | 10372436 | 10372438 | 2 | 166 | 2  | 0.012 | GTTTTCGCGTAAC         |
| Bomo_Ch25 | 10372470 | 10372470 | 1 | 2   | 0  | 0     | AAATGCGTGTG           |

---
